# Supplementary material for: A natural plagioclase reference material for microbeam Sr isotopic analysis
Source: Royal Society of Chemistry journal article supplement (doi:10.1039/d2ja00110a), 2022-01-01
Supplement: d2ja00110a1.pdf [file d2ja00110a1.pdf]

**Table S1** Major and trace element compositions of BDL plagioclase measured by EPMA and LA-ICP-MS.

| Sample   | SiO <sub>2</sub> | TiO <sub>2</sub> | Al <sub>2</sub> O <sub>3</sub> | Cr <sub>2</sub> O <sub>3</sub> | FeO  | MnO  | MgO  | CaO  | Na <sub>2</sub> O | K <sub>2</sub> O | NiO  | F    | Cl   | Total | An | Rb   | Sr   | Y    | Ba  | La   | Ce   |
|----------|------------------|------------------|--------------------------------|--------------------------------|------|------|------|------|-------------------|------------------|------|------|------|-------|----|------|------|------|-----|------|------|
| BDL-1 01 | 55.9             | 0.10             | 26.6                           | 0.01                           | 0.18 | 0.00 | 0.00 | 9.9  | 5.65              | 0.40             | 0.01 | 0.00 | 0.02 | 98.8  | 49 | 0.14 | 2850 | 0.12 | 488 | 3.86 | 6.03 |
| BDL-1 02 | 53.7             | 0.06             | 27.9                           | 0.03                           | 0.05 | 0.00 | 0.00 | 11.5 | 4.96              | 0.07             | 0.05 | 0.01 | 0.01 | 98.4  | 56 | bdl  | 3852 | 0.26 | 614 | 3.91 | 6.79 |
| BDL-1 03 | 52.7             | 0.12             | 28.3                           | 0.00                           | 0.06 | 0.00 | 0.00 | 11.3 | 5.08              | 0.15             | 0.04 | 0.00 | 0.03 | 97.7  | 55 | 0.26 | 2946 | 0.42 | 654 | 7.73 | 12.7 |
| BDL-1 04 | 53.5             | 0.09             | 27.9                           | 0.00                           | 0.05 | 0.02 | 0.01 | 10.4 | 5.75              | 0.06             | 0.00 | 0.02 | 0.03 | 97.8  | 50 | 0.27 | 2996 | 0.17 | 590 | 4.04 | 6.31 |
| BDL-1 05 | 54.4             | 0.08             | 26.9                           | 0.00                           | 0.06 | 0.00 | 0.00 | 11.0 | 5.25              | 0.03             | 0.00 | 0.00 | 0.00 | 97.7  | 54 | 0.09 | 2714 | 0.15 | 715 | 5.76 | 8.77 |
| BDL-1 06 | 54.2             | 0.07             | 27.2                           | 0.00                           | 0.01 | 0.00 | 0.00 | 11.1 | 5.26              | 0.04             | 0.00 | 0.00 | 0.00 | 97.9  | 54 | 1.18 | 2540 | 0.24 | 495 | 9.63 | 14.6 |
| BDL-1 07 | 54.0             | 0.06             | 27.4                           | 0.02                           | 0.09 | 0.00 | 0.01 | 11.2 | 5.21              | 0.07             | 0.00 | 0.00 | 0.03 | 98.1  | 54 | 0.36 | 3224 | 0.19 | 485 | 3.49 | 5.54 |
| BDL-1 08 | 54.8             | 0.07             | 26.8                           | 0.00                           | 0.08 | 0.01 | 0.00 | 10.4 | 5.69              | 0.09             | 0.02 | 0.01 | 0.03 | 98.1  | 50 | 0.41 | 2535 | 0.17 | 394 | 5.88 | 8.52 |
| BDL-1 09 | 54.2             | 0.07             | 27.1                           | 0.04                           | 0.09 | 0.00 | 0.00 | 11.0 | 5.34              | 0.03             | 0.03 | 0.00 | 0.03 | 97.9  | 53 | 0.10 | 2325 | 0.20 | 658 | 5.91 | 9.31 |
| BDL-1 10 | 53.9             | 0.11             | 27.0                           | 0.01                           | 0.08 | 0.00 | 0.00 | 10.9 | 5.28              | 0.07             | 0.02 | 0.00 | 0.01 | 97.3  | 53 | 0.85 | 2911 | 0.18 | 451 | 3.05 | 4.72 |
| BDL-1 11 | 54.0             | 0.09             | 26.8                           | 0.07                           | 0.07 | 0.02 | 0.00 | 11.1 | 5.26              | 0.05             | 0.00 | 0.02 | 0.02 | 97.6  | 54 | 0.10 | 2685 | 0.14 | 467 | 3.38 | 5.67 |
| BDL-1 12 | 54.2             | 0.09             | 27.8                           | 0.00                           | 0.04 | 0.00 | 0.00 | 11.0 | 5.41              | 0.06             | 0.03 | 0.00 | 0.00 | 98.5  | 53 | 0.53 | 2809 | 0.15 | 491 | 4.08 | 6.43 |
| BDL-1 13 | 56.9             | 0.06             | 25.8                           | 0.00                           | 0.08 | 0.00 | 0.00 | 9.3  | 6.18              | 0.09             | 0.00 | 0.00 | 0.05 | 98.5  | 45 | 0.06 | 2374 | 0.15 | 464 | 2.81 | 4.46 |
| BDL-1 14 | 54.1             | 0.20             | 27.3                           | 0.01                           | 0.05 | 0.03 | 0.04 | 11.0 | 5.30              | 0.03             | 0.00 | 0.01 | 0.01 | 98.0  | 53 | bdl  | 2883 | 0.22 | 392 | 4.97 | 8.38 |
| BDL-1 15 | 56.0             | 0.02             | 26.4                           | 0.01                           | 0.08 | 0.01 | 0.00 | 9.8  | 5.89              | 0.05             | 0.04 | 0.00 | 0.01 | 98.3  | 48 | 0.15 | 3067 | 0.48 | 525 | 5.85 | 9.80 |
| BDL-1 16 | 53.9             | 0.07             | 26.9                           | 0.05                           | 0.06 | 0.01 | 0.00 | 10.9 | 5.22              | 0.06             | 0.02 | 0.00 | 0.00 | 97.2  | 54 | bdl  | 2428 | 0.18 | 495 | 3.36 | 5.82 |
| BDL-1 17 | 54.9             | 0.12             | 27.5                           | 0.02                           | 0.02 | 0.01 | 0.01 | 10.9 | 5.45              | 0.08             | 0.01 | 0.00 | 0.00 | 99.0  | 53 | bdl  | 2861 | 0.14 | 514 | 3.87 | 6.19 |
| BDL-1 18 | 54.1             | 0.10             | 27.4                           | 0.03                           | 0.05 | 0.01 | 0.00 | 11.1 | 5.28              | 0.05             | 0.06 | 0.00 | 0.00 | 98.2  | 54 | 0.11 | 3155 | 0.13 | 353 | 8.83 | 12.8 |
| BDL-1 19 | 54.0             | 0.04             | 27.6                           | 0.03                           | 0.05 | 0.01 | 0.00 | 11.3 | 5.23              | 0.02             | 0.01 | 0.00 | 0.01 | 98.4  | 54 | bdl  | 2667 | 0.33 | 452 | 10.3 | 16.5 |
| BDL-1 20 | 53.6             | 0.10             | 27.3                           | 0.01                           | 0.07 | 0.03 | 0.00 | 11.3 | 5.29              | 0.04             | 0.00 | 0.00 | 0.01 | 97.7  | 54 | bdl  | 2898 | 0.16 | 488 | 3.10 | 4.86 |
| Average  | 54.4             | 0.09             | 27.2                           | 0.02                           | 0.07 | 0.01 | 0.00 | 10.8 | 5.40              | 0.08             | 0.02 | 0.00 | 0.01 | 98.1  | 53 | 0.33 | 2836 | 0.21 | 509 | 5.19 | 8.21 |
| 2SD      | 1.9              | 0.07             | 1.1                            | 0.04                           | 0.07 | 0.02 | 0.02 | 1.1  | 0.57              | 0.16             | 0.04 | 0.01 | 0.03 | 0.9   | 5  | 0.66 | 692  | 0.19 | 188 | 4.57 | 6.95 |
| Max      | 56.9             | 0.2              | 28.3                           | 0.1                            | 0.2  | 0.0  | 0.0  | 11.5 | 6.2               | 0.4              | 0.1  | 0.0  | 0.1  | 99.0  | 56 | 1.18 | 3852 | 0.48 | 715 | 10.3 | 16.5 |
| Min      | 52.7             | 0.0              | 25.8                           | 0.0                            | 0.0  | 0.0  | 0.0  | 9.3  | 5.0               | 0.0              | 0.0  | 0.0  | 0.0  | 97.2  | 45 | 0.06 | 2325 | 0.12 | 353 | 2.81 | 4.46 |
| BDL-2 01 | 56.3             | 0.04             | 26.1                           | 0.00                           | 0.18 | 0.01 | 0.02 | 9.6  | 6.17              | 0.21             | 0.02 | 0.00 | 0.04 | 98.7  | 46 | 0.06 | 2580 | 0.16 | 504 | 5.08 | 8.08 |
| BDL-2 02 | 59.1             | 0.01             | 24.3                           | 0.00                           | 0.11 | 0.02 | 0.00 | 7.5  | 7.47              | 0.21             | 0.04 | 0.00 | 0.00 | 98.7  | 36 | 0.17 | 2294 | 0.06 | 384 | 11.1 | 12.5 |
| BDL-2 03 | 55.4             | 0.14             | 27.4                           | 0.04                           | 0.21 | 0.03 | 0.00 | 10.5 | 5.73              | 0.12             | 0.01 | 0.02 | 0.02 | 99.6  | 50 | 0.13 | 2299 | 0.10 | 639 | 7.31 | 9.97 |
| BDL-2 04 | 56.5             | 0.06             | 26.2                           | 0.04                           | 0.23 | 0.01 | 0.00 | 9.6  | 6.02              | 0.41             | 0.00 | 0.00 | 0.00 | 99.0  | 47 | 0.20 | 2440 | 0.16 | 576 | 4.66 | 6.96 |

|               |      |      |      |      |      |      |      |      |      |      |      |      |       |    |      |      |      |     |      |      |
|---------------|------|------|------|------|------|------|------|------|------|------|------|------|-------|----|------|------|------|-----|------|------|
| BDL-2 05 56.9 | 0.02 | 26.3 | 0.00 | 0.12 | 0.02 | 0.00 | 9.2  | 6.23 | 0.34 | 0.00 | 0.00 | 0.01 | 99.1  | 45 | 0.26 | 2680 | 0.21 | 442 | 4.19 | 6.85 |
| BDL-2 06 55.7 | 0.05 | 27.3 | 0.01 | 0.17 | 0.00 | 0.02 | 10.7 | 5.33 | 0.35 | 0.01 | 0.02 | 0.05 | 99.7  | 53 | 0.23 | 2173 | 0.04 | 266 | 8.66 | 8.82 |
| BDL-2 07 55.7 | 0.05 | 27.0 | 0.00 | 0.20 | 0.00 | 0.00 | 10.2 | 5.89 | 0.21 | 0.01 | 0.00 | 0.02 | 99.2  | 49 | 0.09 | 2547 | 0.23 | 540 | 5.01 | 8.63 |
| BDL-2 08 56.0 | 0.06 | 26.3 | 0.01 | 0.07 | 0.00 | 0.02 | 9.4  | 6.33 | 0.21 | 0.00 | 0.00 | 0.14 | 98.5  | 45 | 0.33 | 2386 | 0.12 | 525 | 7.83 | 10.2 |
| BDL-2 09 54.0 | 0.13 | 27.9 | 0.00 | 0.19 | 0.02 | 0.03 | 10.9 | 5.41 | 0.17 | 0.00 | 0.00 | 0.01 | 98.7  | 53 | 2.90 | 2755 | 0.17 | 576 | 4.23 | 6.87 |
| BDL-2 10 53.5 | 0.21 | 27.8 | 0.00 | 0.53 | 0.00 | 0.00 | 11.3 | 4.99 | 0.12 | 0.02 | 0.00 | 0.00 | 98.5  | 56 | 0.70 | 2350 | 0.19 | 609 | 4.56 | 7.35 |
| BDL-2 11 55.7 | 0.08 | 26.8 | 0.02 | 0.17 | 0.01 | 0.00 | 10.0 | 5.91 | 0.19 | 0.00 | 0.02 | 0.02 | 98.9  | 48 | 0.49 | 2419 | 0.16 | 368 | 9.17 | 12.2 |
| BDL-2 12 54.6 | 0.04 | 27.2 | 0.00 | 0.24 | 0.00 | 0.03 | 10.9 | 5.35 | 0.16 | 0.00 | 0.00 | 0.01 | 98.5  | 53 | 6.63 | 879  | 1.43 | 371 | 5.95 | 7.33 |
| BDL-2 13 54.7 | 0.08 | 27.2 | 0.00 | 0.19 | 0.00 | 0.00 | 10.9 | 5.23 | 0.15 | 0.00 | 0.00 | 0.01 | 98.4  | 53 | 0.41 | 3034 | 0.15 | 746 | 4.58 | 7.37 |
| BDL-2 14 55.2 | 0.02 | 27.5 | 0.03 | 0.19 | 0.03 | 0.01 | 10.5 | 5.58 | 0.27 | 0.00 | 0.00 | 0.00 | 99.3  | 51 | 0.24 | 2318 | 0.17 | 608 | 5.15 | 7.53 |
| BDL-2 15 54.1 | 0.04 | 27.7 | 0.00 | 0.10 | 0.00 | 0.00 | 10.8 | 5.18 | 0.18 | 0.00 | 0.00 | 0.00 | 98.1  | 54 | 0.32 | 2119 | 0.05 | 202 | 5.93 | 5.89 |
| BDL-2 16 57.0 | 0.00 | 24.8 | 0.05 | 0.12 | 0.00 | 0.00 | 8.7  | 6.67 | 0.18 | 0.00 | 0.00 | 0.01 | 97.6  | 42 | bdl  | 2551 | 0.14 | 329 | 7.35 | 10.6 |
| BDL-2 17 53.9 | 0.02 | 26.9 | 0.00 | 0.26 | 0.01 | 0.01 | 11.1 | 5.05 | 0.24 | 0.00 | 0.05 | 0.01 | 97.6  | 55 | 0.30 | 2545 | 0.17 | 530 | 4.77 | 8.15 |
| BDL-2 18 56.7 | 0.02 | 26.5 | 0.00 | 0.14 | 0.00 | 0.00 | 9.4  | 6.14 | 0.31 | 0.00 | 0.02 | 0.01 | 99.3  | 46 | 0.22 | 2412 | 0.23 | 477 | 3.46 | 6.03 |
| BDL-2 19 56.1 | 0.04 | 26.4 | 0.05 | 0.10 | 0.00 | 0.00 | 9.4  | 6.28 | 0.19 | 0.02 | 0.00 | 0.00 | 98.5  | 45 | 0.42 | 2215 | 0.14 | 725 | 9.93 | 13.2 |
| BDL-2 20 54.0 | 0.10 | 27.1 | 0.03 | 0.21 | 0.00 | 0.00 | 10.2 | 5.56 | 0.26 | 0.00 | 0.00 | 0.01 | 97.6  | 50 | 7.17 | 2532 | 1.26 | 925 | 7.40 | 12.4 |
| Average       | 55.6 | 0.06 | 26.7 | 0.01 | 0.19 | 0.01 | 10.0 | 5.83 | 0.22 | 0.01 | 0.01 | 0.02 | 98.7  | 49 | 1.12 | 2377 | 0.27 | 517 | 6.31 | 8.85 |
| 2SD           | 2.6  | 0.10 | 1.8  | 0.04 | 0.19 | 0.02 | 1.9  | 1.20 | 0.15 | 0.02 | 0.03 | 0.06 | 1.2   | 10 | 4.26 | 824  | 0.75 | 346 | 4.30 | 4.59 |
| Max           | 59.1 | 0.2  | 27.9 | 0.0  | 0.5  | 0.0  | 11.3 | 7.5  | 0.4  | 0.0  | 0.1  | 0.1  | 99.7  | 56 | 7.17 | 3034 | 1.43 | 925 | 11.1 | 13.2 |
| Min           | 53.5 | 0.0  | 24.3 | 0.0  | 0.1  | 0.0  | 7.5  | 5.0  | 0.1  | 0.0  | 0.0  | 0.0  | 97.6  | 36 | 0.06 | 879  | 0.04 | 202 | 3.46 | 5.89 |
| <hr/>         |      |      |      |      |      |      |      |      |      |      |      |      |       |    |      |      |      |     |      |      |
| BDL-3 01 56.1 | 0.08 | 26.2 | 0.02 | 0.23 | 0.00 | 0.00 | 9.7  | 5.91 | 0.23 | 0.00 | 0.00 | 0.00 | 98.5  | 48 | 0.98 | 2723 | 0.13 | 589 | 5.36 | 8.62 |
| BDL-3 02 54.3 | 0.07 | 27.6 | 0.02 | 0.23 | 0.01 | 0.00 | 11.3 | 5.02 | 0.23 | 0.04 | 0.00 | 0.00 | 98.9  | 55 | 0.16 | 2780 | 0.23 | 502 | 4.46 | 7.81 |
| BDL-3 03 54.2 | 0.08 | 27.5 | 0.00 | 0.13 | 0.00 | 0.00 | 11.4 | 4.96 | 0.15 | 0.00 | 0.00 | 0.00 | 98.4  | 56 | 0.19 | 2689 | 0.07 | 620 | 7.43 | 10.4 |
| BDL-3 04 56.5 | 0.11 | 27.4 | 0.00 | 0.11 | 0.01 | 0.00 | 10.1 | 5.88 | 0.05 | 0.00 | 0.00 | 0.00 | 100.2 | 49 | 1.02 | 2659 | 0.15 | 484 | 4.56 | 7.98 |
| BDL-3 05 54.8 | 0.06 | 27.0 | 0.01 | 0.15 | 0.02 | 0.00 | 9.7  | 5.98 | 0.24 | 0.05 | 0.00 | 0.01 | 98.1  | 47 | 0.19 | 2872 | 0.10 | 458 | 3.47 | 5.78 |
| BDL-3 06 53.0 | 0.10 | 28.7 | 0.01 | 0.14 | 0.03 | 0.03 | 11.9 | 4.93 | 0.06 | 0.00 | 0.03 | 0.02 | 99.0  | 57 | 2.31 | 2852 | 0.13 | 575 | 3.54 | 5.62 |
| BDL-3 07 55.3 | 0.17 | 27.2 | 0.01 | 0.17 | 0.00 | 0.00 | 9.4  | 6.36 | 0.22 | 0.00 | 0.20 | 0.03 | 99.0  | 45 | 0.48 | 2653 | 0.10 | 769 | 7.60 | 7.65 |
| BDL-3 08 54.0 | 0.10 | 27.2 | 0.01 | 0.14 | 0.01 | 0.02 | 10.2 | 5.93 | 0.24 | 0.00 | 0.00 | 0.02 | 97.8  | 49 | 0.16 | 2842 | 0.09 | 723 | 8.66 | 11.5 |
| BDL-3 09 54.2 | 0.09 | 27.2 | 0.02 | 0.14 | 0.01 | 0.00 | 10.1 | 5.91 | 0.31 | 0.01 | 0.00 | 0.01 | 97.9  | 48 | 0.41 | 2740 | 0.09 | 653 | 4.97 | 7.37 |
| BDL-3 10 51.2 | 0.10 | 28.7 | 0.05 | 0.18 | 0.01 | 0.01 | 11.6 | 4.81 | 0.16 | 0.04 | 0.00 | 0.02 | 96.9  | 57 | 0.19 | 2842 | 0.15 | 581 | 6.54 | 10.6 |

|               |      |      |      |      |      |      |      |      |      |      |      |      |       |    |      |      |      |     |      |      |
|---------------|------|------|------|------|------|------|------|------|------|------|------|------|-------|----|------|------|------|-----|------|------|
| BDL-3 11 55.4 | 0.12 | 26.6 | 0.00 | 0.13 | 0.00 | 0.00 | 10.2 | 5.67 | 0.14 | 0.01 | 0.00 | 0.00 | 98.3  | 50 | 0.23 | 2481 | 0.05 | 521 | 11.4 | 11.6 |
| BDL-3 12 54.8 | 0.08 | 27.2 | 0.02 | 0.13 | 0.03 | 0.02 | 10.8 | 5.50 | 0.15 | 0.00 | 0.00 | 0.02 | 98.7  | 52 | 0.56 | 3077 | 0.07 | 694 | 5.34 | 10.2 |
| BDL-3 13 57.7 | 0.00 | 26.2 | 0.01 | 0.13 | 0.02 | 0.02 | 8.8  | 6.66 | 0.10 | 0.00 | 0.00 | 0.02 | 99.6  | 42 | 0.21 | 2912 | 0.12 | 544 | 3.34 | 5.83 |
| BDL-3 14 56.4 | 0.07 | 26.2 | 0.00 | 0.13 | 0.01 | 0.01 | 9.5  | 6.16 | 0.14 | 0.03 | 0.00 | 0.02 | 98.6  | 46 | 0.17 | 2620 | 0.15 | 630 | 4.99 | 8.19 |
| BDL-3 15 56.8 | 0.05 | 25.8 | 0.01 | 0.17 | 0.02 | 0.02 | 8.2  | 6.96 | 0.42 | 0.00 | 0.00 | 0.01 | 98.4  | 39 | 0.34 | 2660 | 0.09 | 877 | 8.88 | 10.3 |
| BDL-3 16 53.4 | 0.09 | 27.7 | 0.00 | 0.11 | 0.02 | 0.00 | 10.4 | 5.71 | 0.07 | 0.03 | 0.00 | 0.01 | 97.5  | 50 | 0.22 | 2711 | 0.12 | 469 | 4.01 | 6.33 |
| BDL-3 17 57.5 | 0.05 | 23.6 | 0.01 | 0.14 | 0.00 | 0.00 | 7.6  | 7.02 | 0.40 | 0.02 | 0.00 | 0.03 | 96.4  | 38 | 0.29 | 2363 | 0.04 | 472 | 11.3 | 10.4 |
| BDL-3 18 53.7 | 0.12 | 27.3 | 0.00 | 0.17 | 0.04 | 0.00 | 9.8  | 6.03 | 0.29 | 0.01 | 0.00 | 0.02 | 97.4  | 47 | 0.53 | 2753 | 0.06 | 907 | 10.0 | 9.17 |
| BDL-3 19 52.3 | 0.09 | 28.5 | 0.00 | 0.11 | 0.02 | 0.00 | 11.4 | 4.97 | 0.16 | 0.00 | 0.00 | 0.02 | 97.5  | 56 | 0.09 | 2600 | 0.11 | 718 | 8.27 | 10.6 |
| BDL-3 20 53.6 | 0.05 | 27.6 | 0.00 | 0.17 | 0.00 | 0.00 | 10.2 | 5.77 | 0.23 | 0.00 | 0.00 | 0.02 | 97.6  | 49 | 0.12 | 2966 | 0.12 | 439 | 3.14 | 5.34 |
| Average 54.8  | 0.08 | 27.1 | 0.01 | 0.15 | 0.01 | 0.01 | 10.1 | 5.81 | 0.20 | 0.01 | 0.01 | 0.01 | 98.2  | 49 | 0.44 | 2740 | 0.11 | 611 | 6.36 | 8.56 |
| 2SD 3.3       | 0.07 | 2.2  | 0.02 | 0.06 | 0.02 | 0.02 | 2.2  | 1.26 | 0.20 | 0.03 | 0.09 | 0.02 | 1.7   | 11 | 1.02 | 329  | 0.09 | 272 | 5.33 | 4.13 |
| Max 57.7      | 0.2  | 28.7 | 0.0  | 0.2  | 0.0  | 0.0  | 11.9 | 7.0  | 0.4  | 0.0  | 0.2  | 0.0  | 100.2 | 57 | 2.31 | 3077 | 0.23 | 907 | 11.4 | 11.6 |
| Min 51.2      | 0.0  | 23.6 | 0.0  | 0.1  | 0.0  | 0.0  | 7.6  | 4.8  | 0.1  | 0.0  | 0.0  | 0.0  | 96.4  | 38 | 0.09 | 2363 | 0.04 | 439 | 3.14 | 5.34 |

| <b>Pr</b> | <b>Nd</b> | <b>Sm</b> | <b>Eu</b> | <b>Gd</b> | <b>Tb</b> | <b>Dy</b> | <b>Ho</b> | <b>Er</b> | <b>Tm</b> | <b>Yb</b> | <b>Lu</b> | <b>Pb</b> |
|-----------|-----------|-----------|-----------|-----------|-----------|-----------|-----------|-----------|-----------|-----------|-----------|-----------|
| 0.58      | 1.73      | 0.26      | 0.60      | 0.13      | bdl       | 1.74      |
| 0.64      | 2.11      | 0.30      | 0.52      | 0.17      | bdl       | bdl       | bdl       | 0.04      | bdl       | bdl       | bdl       | 6.52      |
| 1.15      | 4.04      | 0.58      | 0.68      | 0.23      | 0.04      | 0.09      | 0.02      | 0.03      | bdl       | 0.07      | bdl       | 2.52      |
| 0.57      | 1.90      | 0.21      | 0.73      | 0.19      | bdl       | 0.08      | bdl       | bdl       | bdl       | 0.06      | bdl       | 3.79      |
| 0.90      | 2.80      | 0.23      | 1.04      | 0.15      | bdl       | 0.11      | bdl       | bdl       | bdl       | bdl       | bdl       | 4.92      |
| 1.26      | 3.77      | 0.29      | 0.66      | 0.24      | 0.05      | bdl       | 0.02      | 0.02      | bdl       | bdl       | bdl       | 3.25      |
| 0.57      | 1.95      | 0.29      | 0.66      | bdl       | 6.83      |
| 0.71      | 2.17      | 0.19      | 0.35      | bdl       | bdl       | bdl       | 0.01      | 0.02      | bdl       | bdl       | bdl       | 5.95      |
| 0.93      | 2.43      | 0.36      | 0.91      | 0.21      | bdl       | bdl       | 0.01      | bdl       | bdl       | 0.05      | bdl       | 3.23      |
| 0.49      | 1.74      | 0.19      | 0.66      | bdl       | bdl       | bdl       | bdl       | 0.03      | bdl       | bdl       | bdl       | 2.98      |
| 0.57      | 1.83      | 0.21      | 0.60      | bdl       | 0.03      | bdl       | bdl       | bdl       | bdl       | bdl       | bdl       | 2.02      |
| 0.62      | 2.12      | 0.24      | 0.65      | bdl       | 0.05      | bdl       | bdl       | 0.02      | bdl       | bdl       | bdl       | 2.68      |
| 0.43      | 1.42      | 0.19      | 0.88      | bdl       | bdl       | bdl       | 0.01      | 0.02      | bdl       | bdl       | bdl       | 6.32      |
| 0.82      | 2.87      | 0.32      | 0.67      | bdl       | 0.03      | 0.06      | bdl       | bdl       | bdl       | 0.05      | bdl       | 3.97      |
| 1.02      | 3.96      | 0.61      | 0.71      | 0.20      | bdl       | 0.15      | 0.02      | 0.06      | bdl       | bdl       | bdl       | 2.57      |
| 0.55      | 1.97      | 0.23      | 0.73      | 0.13      | bdl       | 0.07      | bdl       | bdl       | bdl       | bdl       | bdl       | 2.20      |
| 0.57      | 2.03      | 0.21      | 0.74      | bdl       | bdl       | 0.05      | bdl       | bdl       | bdl       | bdl       | bdl       | 2.25      |
| 1.01      | 2.87      | 0.23      | 0.48      | 0.19      | bdl       | 0.06      | bdl       | bdl       | bdl       | bdl       | bdl       | 3.11      |
| 1.53      | 4.75      | 0.48      | 0.91      | 0.20      | bdl       | 0.10      | 0.01      | 0.03      | bdl       | bdl       | bdl       | 2.84      |
| 0.44      | 1.52      | 0.14      | 0.80      | bdl       | bdl       | bdl       | 0.01      | 0.01      | bdl       | bdl       | bdl       | 5.55      |
| 0.77      | 2.50      | 0.29      | 0.70      | 0.18      | 0.04      | 0.09      | 0.01      | 0.03      | bdl       | 0.05      | bdl       | 3.76      |
| 0.60      | 1.88      | 0.25      | 0.32      | 0.07      | 0.02      | 0.06      | 0.01      | 0.02      | bdl       | 0.02      | bdl       | 3.29      |
| 1.53      | 4.75      | 0.61      | 1.04      | 0.24      | 0.05      | 0.15      | 0.02      | 0.06      | 0.00      | 0.07      | bdl       | 6.83      |
| 0.43      | 1.42      | 0.14      | 0.35      | 0.13      | 0.03      | 0.05      | 0.01      | 0.01      | 0.00      | 0.05      | bdl       | 1.74      |
| 0.72      | 2.36      | 0.19      | 0.75      | bdl       | bdl       | bdl       | 0.01      | 0.03      | bdl       | bdl       | bdl       | 5.40      |
| 0.93      | 2.49      | 0.14      | 0.82      | bdl       | bdl       | bdl       | bdl       | 0.01      | bdl       | bdl       | bdl       | 8.67      |
| 0.79      | 2.44      | 0.18      | 0.80      | bdl       | bdl       | bdl       | 0.01      | bdl       | bdl       | bdl       | bdl       | 6.36      |
| 0.68      | 2.09      | 0.23      | 0.79      | bdl       | bdl       | 0.05      | bdl       | 0.03      | bdl       | bdl       | bdl       | 4.67      |



|      |      |      |      |      |      |      |      |      |     |      |     |      |
|------|------|------|------|------|------|------|------|------|-----|------|-----|------|
| 0.68 | 1.63 | 0.11 | 0.57 | bdl  | bdl  | bdl  | bdl  | 0.01 | bdl | 0.03 | bdl | 8.09 |
| 1.06 | 2.38 | 0.05 | 0.74 | bdl  | bdl  | bdl  | 0.01 | bdl  | bdl | bdl  | bdl | 10.9 |
| 0.53 | 1.71 | 0.13 | 0.45 | bdl  | bdl  | bdl  | 0.01 | 0.01 | bdl | 0.01 | bdl | 7.16 |
| 0.77 | 2.63 | 0.26 | 0.74 | bdl  | bdl  | bdl  | bdl  | bdl  | bdl | bdl  | bdl | 3.89 |
| 0.69 | 1.81 | 0.18 | 0.52 | bdl  | bdl  | bdl  | 0.01 | bdl  | bdl | bdl  | bdl | 6.63 |
| 0.60 | 1.84 | 0.17 | 0.51 | 0.11 | 0.03 | bdl  | 0.01 | 0.01 | bdl | bdl  | bdl | 4.06 |
| 0.63 | 1.49 | 0.14 | 0.53 | bdl  | bdl  | bdl  | bdl  | bdl  | bdl | bdl  | bdl | 8.94 |
| 0.52 | 1.24 | 0.06 | 0.49 | bdl  | bdl  | bdl  | bdl  | bdl  | bdl | bdl  | bdl | 5.89 |
| 0.81 | 2.20 | 0.16 | 0.49 | bdl  | bdl  | bdl  | bdl  | bdl  | bdl | 0.02 | bdl | 6.85 |
| 0.51 | 1.75 | 0.18 | 0.53 | bdl  | bdl  | bdl  | bdl  | 0.02 | bdl | bdl  | bdl | 4.58 |
| 0.70 | 1.97 | 0.17 | 0.56 | 0.15 | 0.03 | 0.04 | 0.01 | 0.01 | bdl | 0.03 | bdl | 6.43 |
| 0.31 | 0.83 | 0.12 | 0.17 | 0.09 | 0.01 | 0.01 | 0.00 | 0.01 | bdl | 0.03 | bdl | 3.35 |
| 1.06 | 2.66 | 0.27 | 0.74 | 0.20 | 0.03 | 0.05 | 0.01 | 0.03 | bdl | 0.05 | bdl | 10.9 |
| 0.51 | 1.24 | 0.05 | 0.41 | 0.09 | 0.03 | 0.04 | 0.01 | 0.01 | bdl | 0.01 | bdl | 3.89 |

---
