# Supplementary material for: A natural plagioclase reference material for microbeam Sr isotopic analysis
Source: Royal Society of Chemistry journal article supplement (doi:10.1039/d2ja00110a), 2022-01-01
Supplement: d2ja00110a2.pdf [file d2ja00110a2.pdf]

**Table S2** LA-MC-ICP-MS data of Sr isotope ratios of reference materials and the BDL plagioclase.

| Day                       | Sample             | <sup>84</sup> Sr(V) | <sup>85</sup> Rb(V) | <sup>86</sup> Sr(V) | <sup>87</sup> Sr(V) | <sup>88</sup> Sr(V) | <sup>84</sup> Sr/ <sup>86</sup> Sr | 2SE    | <sup>84</sup> Sr/ <sup>88</sup> Sr | 2SE     | <sup>87</sup> Rb/ <sup>86</sup> Sr | 2SE     | <sup>87</sup> Sr/ <sup>86</sup> Sr | 2SE            |
|---------------------------|--------------------|---------------------|---------------------|---------------------|---------------------|---------------------|------------------------------------|--------|------------------------------------|---------|------------------------------------|---------|------------------------------------|----------------|
| <b>Reference material</b> |                    |                     |                     |                     |                     |                     |                                    |        |                                    |         |                                    |         |                                    |                |
| D1                        | Sly 01             | 0.028               | 0.000035            | 0.504               | 0.363               | 4.37                | 0.0568                             | 0.0001 | 0.00673                            | 0.00002 | 0.00003                            | 0.00001 | 0.70770                            | 0.00005        |
| D1                        | Sly 02             | 0.028               | 0.000026            | 0.513               | 0.370               | 4.45                | 0.0570                             | 0.0001 | 0.00675                            | 0.00001 | 0.00002                            | 0.00001 | 0.70771                            | 0.00005        |
| D1                        | Sly 03             | 0.028               | 0.000029            | 0.514               | 0.370               | 4.45                | 0.0567                             | 0.0001 | 0.00672                            | 0.00002 | 0.00002                            | 0.00001 | 0.70768                            | 0.00005        |
| D2                        | Sly 04             | 0.029               | 0.000029            | 0.526               | 0.379               | 4.56                | 0.0569                             | 0.0001 | 0.00674                            | 0.00001 | 0.00002                            | 0.00001 | 0.70771                            | 0.00004        |
| D2                        | Sly 05             | 0.030               | 0.000021            | 0.539               | 0.388               | 4.67                | 0.0569                             | 0.0001 | 0.00674                            | 0.00001 | 0.00001                            | 0.00001 | 0.70771                            | 0.00004        |
| D2                        | Sly 06             | 0.031               | 0.000042            | 0.562               | 0.404               | 4.87                | 0.0569                             | 0.0001 | 0.00674                            | 0.00001 | 0.00003                            | 0.00001 | 0.70766                            | 0.00005        |
| D2                        | Sly 07             | 0.030               | 0.000033            | 0.544               | 0.391               | 4.71                | 0.0565                             | 0.0001 | 0.00670                            | 0.00002 | 0.00002                            | 0.00001 | 0.70766                            | 0.00005        |
| D3                        | Sly 08             | 0.031               | 0.000030            | 0.559               | 0.403               | 4.85                | 0.0569                             | 0.0001 | 0.00674                            | 0.00001 | 0.00002                            | 0.00001 | 0.70772                            | 0.00005        |
| D3                        | Sly 09             | 0.030               | 0.000033            | 0.553               | 0.398               | 4.79                | 0.0568                             | 0.0001 | 0.00673                            | 0.00001 | 0.00002                            | 0.00001 | 0.70773                            | 0.00004        |
| D3                        | Sly 10             | 0.028               | 0.000074            | 0.515               | 0.371               | 4.46                | 0.0563                             | 0.0001 | 0.00667                            | 0.00001 | 0.00006                            | 0.00003 | 0.70771                            | 0.00004        |
| D4                        | Sly 11             | 0.027               | 0.000044            | 0.498               | 0.359               | 4.32                | 0.0563                             | 0.0001 | 0.00667                            | 0.00001 | 0.00003                            | 0.00001 | 0.70775                            | 0.00005        |
| D4                        | Sly 12             | 0.027               | 0.000059            | 0.498               | 0.358               | 4.31                | 0.0565                             | 0.0002 | 0.00669                            | 0.00002 | 0.00004                            | 0.00001 | 0.70774                            | 0.00005        |
| D4                        | Sly 13             | 0.028               | 0.000049            | 0.510               | 0.367               | 4.42                | 0.0564                             | 0.0001 | 0.00668                            | 0.00001 | 0.00004                            | 0.00001 | 0.70774                            | 0.00004        |
| D5                        | Sly 14             | 0.028               | 0.000001            | 0.504               | 0.363               | 4.37                | 0.0564                             | 0.0001 | 0.00668                            | 0.00001 | 0.00000                            | 0.00001 | 0.70777                            | 0.00005        |
| D5                        | Sly 15             | 0.027               | 0.000007            | 0.500               | 0.360               | 4.33                | 0.0564                             | 0.0001 | 0.00668                            | 0.00002 | 0.00001                            | 0.00001 | 0.70776                            | 0.00004        |
| D5                        | Sly 16             | 0.027               | 0.000054            | 0.497               | 0.358               | 4.31                | 0.0561                             | 0.0001 | 0.00665                            | 0.00002 | 0.00004                            | 0.00001 | 0.70767                            | 0.00004        |
| D5                        | Sly 17             | 0.027               | 0.000064            | 0.485               | 0.349               | 4.20                | 0.0565                             | 0.0002 | 0.00669                            | 0.00002 | 0.00005                            | 0.00001 | 0.70777                            | 0.00005        |
| D6                        | Sly 18             | 0.026               | 0.000050            | 0.467               | 0.336               | 4.05                | 0.0566                             | 0.0001 | 0.00670                            | 0.00002 | 0.00004                            | 0.00001 | 0.70780                            | 0.00005        |
| D6                        | Sly 19             | 0.027               | 0.000054            | 0.483               | 0.348               | 4.19                | 0.0567                             | 0.0001 | 0.00672                            | 0.00001 | 0.00004                            | 0.00001 | 0.70781                            | 0.00004        |
| D6                        | Sly 20             | 0.027               | 0.000053            | 0.497               | 0.358               | 4.31                | 0.0565                             | 0.0001 | 0.00669                            | 0.00002 | 0.00004                            | 0.00001 | 0.70776                            | 0.00005        |
|                           | <b>Average/2SD</b> |                     |                     |                     |                     |                     |                                    |        |                                    |         |                                    |         | <b>0.70773</b>                     | <b>0.00009</b> |
| D1                        | JH56 01            | 0.013               | 0.003376            | 0.234               | 0.171               | 2.03                | 0.0559                             | 0.0003 | 0.00667                            | 0.00004 | 0.00537                            | 0.00038 | 0.71204                            | 0.00008        |
| D1                        | JH56 02            | 0.015               | 0.007130            | 0.269               | 0.197               | 2.32                | 0.0562                             | 0.0003 | 0.00671                            | 0.00003 | 0.01009                            | 0.00023 | 0.71212                            | 0.00007        |

|    |         |       |          |       |       |      |        |        |         |         |         |         |         |         |
|----|---------|-------|----------|-------|-------|------|--------|--------|---------|---------|---------|---------|---------|---------|
| D1 | JH56 03 | 0.012 | 0.002003 | 0.227 | 0.165 | 1.96 | 0.0565 | 0.0003 | 0.00674 | 0.00003 | 0.00328 | 0.00025 | 0.71205 | 0.00007 |
| D1 | JH56 04 | 0.014 | 0.003406 | 0.263 | 0.192 | 2.27 | 0.0559 | 0.0003 | 0.00668 | 0.00003 | 0.00494 | 0.00029 | 0.71202 | 0.00007 |
| D1 | JH56 05 | 0.013 | 0.001937 | 0.238 | 0.173 | 2.06 | 0.0560 | 0.0003 | 0.00668 | 0.00003 | 0.00311 | 0.00013 | 0.71212 | 0.00007 |
| D1 | JH56 06 | 0.007 | 0.001049 | 0.133 | 0.097 | 1.15 | 0.0568 | 0.0005 | 0.00678 | 0.00006 | 0.00277 | 0.00028 | 0.71224 | 0.00012 |
| D1 | JH56 07 | 0.013 | 0.001884 | 0.238 | 0.173 | 2.06 | 0.0559 | 0.0003 | 0.00667 | 0.00003 | 0.00296 | 0.00025 | 0.71208 | 0.00008 |
| D1 | JH56 08 | 0.014 | 0.002247 | 0.254 | 0.184 | 2.19 | 0.0560 | 0.0003 | 0.00669 | 0.00003 | 0.00346 | 0.00040 | 0.71210 | 0.00007 |
| D1 | JH56 09 | 0.014 | 0.005287 | 0.251 | 0.184 | 2.17 | 0.0565 | 0.0003 | 0.00674 | 0.00003 | 0.00818 | 0.00051 | 0.71210 | 0.00007 |
| D1 | JH56 10 | 0.012 | 0.003579 | 0.228 | 0.166 | 1.97 | 0.0560 | 0.0004 | 0.00669 | 0.00004 | 0.00597 | 0.00037 | 0.71206 | 0.00008 |
| D1 | JH56 11 | 0.005 | 0.008286 | 0.083 | 0.064 | 0.72 | 0.0559 | 0.0010 | 0.00667 | 0.00011 | 0.03324 | 0.00266 | 0.71212 | 0.00025 |
| D1 | JH56 12 | 0.013 | 0.006697 | 0.232 | 0.171 | 2.01 | 0.0563 | 0.0003 | 0.00672 | 0.00003 | 0.01112 | 0.00074 | 0.71213 | 0.00008 |
| D2 | JH56 13 | 0.015 | 0.002455 | 0.267 | 0.194 | 2.31 | 0.0558 | 0.0003 | 0.00666 | 0.00003 | 0.00354 | 0.00035 | 0.71205 | 0.00008 |
| D2 | JH56 14 | 0.005 | 0.000581 | 0.085 | 0.061 | 0.73 | 0.0567 | 0.0008 | 0.00677 | 0.00010 | 0.00236 | 0.00036 | 0.71207 | 0.00019 |
| D2 | JH56 15 | 0.014 | 0.001570 | 0.253 | 0.184 | 2.19 | 0.0565 | 0.0003 | 0.00675 | 0.00003 | 0.00233 | 0.00010 | 0.71209 | 0.00007 |
| D2 | JH56 16 | 0.015 | 0.015431 | 0.267 | 0.199 | 2.31 | 0.0563 | 0.0002 | 0.00673 | 0.00003 | 0.02232 | 0.00248 | 0.71211 | 0.00006 |
| D2 | JH56 17 | 0.014 | 0.000978 | 0.259 | 0.188 | 2.25 | 0.0561 | 0.0003 | 0.00670 | 0.00003 | 0.00143 | 0.00003 | 0.71204 | 0.00007 |
| D2 | JH56 18 | 0.013 | 0.000522 | 0.246 | 0.178 | 2.13 | 0.0558 | 0.0002 | 0.00666 | 0.00003 | 0.00081 | 0.00004 | 0.71212 | 0.00007 |
| D2 | JH56 19 | 0.014 | 0.000711 | 0.258 | 0.187 | 2.23 | 0.0561 | 0.0003 | 0.00670 | 0.00003 | 0.00104 | 0.00006 | 0.71206 | 0.00008 |
| D2 | JH56 20 | 0.009 | 0.001321 | 0.172 | 0.125 | 1.49 | 0.0559 | 0.0003 | 0.00667 | 0.00004 | 0.00285 | 0.00030 | 0.71196 | 0.00011 |
| D2 | JH56 21 | 0.009 | 0.001018 | 0.159 | 0.116 | 1.38 | 0.0559 | 0.0004 | 0.00667 | 0.00005 | 0.00242 | 0.00014 | 0.71206 | 0.00011 |
| D2 | JH56 22 | 0.009 | 0.000439 | 0.170 | 0.123 | 1.47 | 0.0562 | 0.0004 | 0.00671 | 0.00004 | 0.00098 | 0.00008 | 0.71209 | 0.00011 |
| D2 | JH56 23 | 0.010 | 0.001373 | 0.176 | 0.128 | 1.53 | 0.0562 | 0.0004 | 0.00671 | 0.00005 | 0.00298 | 0.00021 | 0.71195 | 0.00010 |
| D2 | JH56 24 | 0.011 | 0.000566 | 0.202 | 0.146 | 1.75 | 0.0567 | 0.0003 | 0.00676 | 0.00003 | 0.00107 | 0.00008 | 0.71212 | 0.00009 |
| D2 | JH56 25 | 0.011 | 0.002160 | 0.201 | 0.147 | 1.74 | 0.0563 | 0.0003 | 0.00673 | 0.00004 | 0.00398 | 0.00030 | 0.71215 | 0.00036 |
| D3 | JH56 26 | 0.008 | 0.001010 | 0.143 | 0.104 | 1.24 | 0.0568 | 0.0008 | 0.00679 | 0.00010 | 0.00293 | 0.00022 | 0.71217 | 0.00024 |
| D3 | JH56 27 | 0.012 | 0.000501 | 0.214 | 0.155 | 1.85 | 0.0566 | 0.0003 | 0.00675 | 0.00004 | 0.00089 | 0.00004 | 0.71214 | 0.00008 |
| D3 | JH56 28 | 0.013 | 0.000980 | 0.245 | 0.178 | 2.12 | 0.0559 | 0.0003 | 0.00668 | 0.00003 | 0.00150 | 0.00013 | 0.71204 | 0.00006 |

|    |         |       |          |       |       |      |        |        |         |         |         |         |         |         |
|----|---------|-------|----------|-------|-------|------|--------|--------|---------|---------|---------|---------|---------|---------|
| D3 | JH56 29 | 0.014 | 0.008320 | 0.249 | 0.184 | 2.16 | 0.0560 | 0.0002 | 0.00669 | 0.00003 | 0.01258 | 0.00078 | 0.71212 | 0.00007 |
| D3 | JH56 30 | 0.012 | 0.002375 | 0.221 | 0.161 | 1.92 | 0.0561 | 0.0003 | 0.00670 | 0.00003 | 0.00396 | 0.00021 | 0.71206 | 0.00009 |
| D3 | JH56 31 | 0.011 | 0.001167 | 0.206 | 0.150 | 1.79 | 0.0564 | 0.0003 | 0.00673 | 0.00003 | 0.00213 | 0.00010 | 0.71217 | 0.00009 |
| D3 | JH56 32 | 0.013 | 0.000778 | 0.243 | 0.177 | 2.11 | 0.0566 | 0.0002 | 0.00675 | 0.00003 | 0.00121 | 0.00012 | 0.71213 | 0.00008 |
| D3 | JH56 33 | 0.012 | 0.008630 | 0.212 | 0.157 | 1.83 | 0.0564 | 0.0003 | 0.00673 | 0.00004 | 0.01545 | 0.00063 | 0.71208 | 0.00008 |
| D3 | JH56 34 | 0.011 | 0.000631 | 0.205 | 0.149 | 1.77 | 0.0561 | 0.0003 | 0.00670 | 0.00004 | 0.00117 | 0.00003 | 0.71205 | 0.00008 |
| D3 | JH56 35 | 0.012 | 0.022194 | 0.215 | 0.164 | 1.86 | 0.0565 | 0.0003 | 0.00674 | 0.00003 | 0.03906 | 0.00114 | 0.71212 | 0.00008 |
| D3 | JH56 36 | 0.010 | 0.006590 | 0.190 | 0.140 | 1.65 | 0.0562 | 0.0004 | 0.00671 | 0.00004 | 0.01305 | 0.00085 | 0.71218 | 0.00010 |
| D3 | JH56 37 | 0.011 | 0.002148 | 0.201 | 0.146 | 1.74 | 0.0560 | 0.0003 | 0.00668 | 0.00004 | 0.00407 | 0.00026 | 0.71204 | 0.00010 |
| D3 | JH56 38 | 0.010 | 0.000529 | 0.190 | 0.138 | 1.65 | 0.0561 | 0.0003 | 0.00670 | 0.00004 | 0.00105 | 0.00003 | 0.71215 | 0.00009 |
| D3 | JH56 39 | 0.011 | 0.000621 | 0.200 | 0.145 | 1.74 | 0.0565 | 0.0003 | 0.00675 | 0.00004 | 0.00117 | 0.00008 | 0.71221 | 0.00009 |
| D4 | JH56 40 | 0.011 | 0.000917 | 0.199 | 0.145 | 1.73 | 0.0557 | 0.0003 | 0.00665 | 0.00004 | 0.00174 | 0.00005 | 0.71199 | 0.00008 |
| D4 | JH56 41 | 0.011 | 0.000319 | 0.210 | 0.152 | 1.82 | 0.0560 | 0.0003 | 0.00669 | 0.00004 | 0.00058 | 0.00002 | 0.71212 | 0.00009 |
| D4 | JH56 42 | 0.013 | 0.000415 | 0.232 | 0.168 | 2.01 | 0.0566 | 0.0003 | 0.00676 | 0.00004 | 0.00067 | 0.00004 | 0.71220 | 0.00008 |
| D4 | JH56 43 | 0.013 | 0.000341 | 0.230 | 0.167 | 1.99 | 0.0562 | 0.0003 | 0.00671 | 0.00003 | 0.00056 | 0.00002 | 0.71218 | 0.00007 |
| D4 | JH56 44 | 0.013 | 0.000392 | 0.242 | 0.175 | 2.09 | 0.0561 | 0.0003 | 0.00669 | 0.00004 | 0.00062 | 0.00003 | 0.71213 | 0.00008 |
| D4 | JH56 45 | 0.010 | 0.000692 | 0.187 | 0.136 | 1.62 | 0.0561 | 0.0004 | 0.00670 | 0.00004 | 0.00140 | 0.00016 | 0.71235 | 0.00009 |
| D4 | JH56 46 | 0.011 | 0.000822 | 0.199 | 0.144 | 1.72 | 0.0563 | 0.0003 | 0.00672 | 0.00004 | 0.00156 | 0.00019 | 0.71227 | 0.00009 |
| D4 | JH56 47 | 0.011 | 0.000951 | 0.207 | 0.150 | 1.79 | 0.0562 | 0.0003 | 0.00672 | 0.00004 | 0.00177 | 0.00018 | 0.71218 | 0.00008 |
| D4 | JH56 48 | 0.012 | 0.001499 | 0.214 | 0.156 | 1.86 | 0.0556 | 0.0003 | 0.00664 | 0.00003 | 0.00263 | 0.00026 | 0.71210 | 0.00009 |
| D4 | JH56 49 | 0.012 | 0.005524 | 0.226 | 0.166 | 1.96 | 0.0563 | 0.0003 | 0.00672 | 0.00004 | 0.00921 | 0.00049 | 0.71211 | 0.00009 |
| D4 | JH56 50 | 0.012 | 0.007581 | 0.229 | 0.169 | 1.99 | 0.0562 | 0.0003 | 0.00672 | 0.00004 | 0.01269 | 0.00184 | 0.71214 | 0.00008 |
| D4 | JH56 51 | 0.013 | 0.001934 | 0.234 | 0.170 | 2.03 | 0.0564 | 0.0003 | 0.00674 | 0.00003 | 0.00308 | 0.00032 | 0.71216 | 0.00008 |
| D5 | JH56 52 | 0.010 | 0.008460 | 0.178 | 0.132 | 1.54 | 0.0572 | 0.0003 | 0.00683 | 0.00004 | 0.01804 | 0.00246 | 0.71222 | 0.00008 |
| D5 | JH56 53 | 0.010 | 0.000548 | 0.179 | 0.130 | 1.55 | 0.0562 | 0.0003 | 0.00671 | 0.00004 | 0.00116 | 0.00003 | 0.71207 | 0.00010 |
| D5 | JH56 54 | 0.009 | 0.001385 | 0.168 | 0.122 | 1.45 | 0.0561 | 0.0004 | 0.00670 | 0.00004 | 0.00315 | 0.00017 | 0.71218 | 0.00011 |

|                    |         |       |          |       |       |      |        |        |         |         |         |         |                |                |
|--------------------|---------|-------|----------|-------|-------|------|--------|--------|---------|---------|---------|---------|----------------|----------------|
| D5                 | JH56 55 | 0.009 | 0.001263 | 0.173 | 0.126 | 1.50 | 0.0562 | 0.0004 | 0.00672 | 0.00004 | 0.00283 | 0.00050 | 0.71217        | 0.00009        |
| D5                 | JH56 56 | 0.009 | 0.000538 | 0.157 | 0.114 | 1.36 | 0.0559 | 0.0005 | 0.00668 | 0.00006 | 0.00128 | 0.00008 | 0.71200        | 0.00011        |
| D5                 | JH56 57 | 0.010 | 0.006562 | 0.186 | 0.137 | 1.61 | 0.0564 | 0.0004 | 0.00674 | 0.00004 | 0.01319 | 0.00101 | 0.71223        | 0.00009        |
| D5                 | JH56 58 | 0.011 | 0.001530 | 0.193 | 0.140 | 1.67 | 0.0563 | 0.0003 | 0.00672 | 0.00003 | 0.00301 | 0.00007 | 0.71219        | 0.00009        |
| D5                 | JH56 59 | 0.010 | 0.000648 | 0.186 | 0.135 | 1.61 | 0.0560 | 0.0003 | 0.00669 | 0.00004 | 0.00133 | 0.00013 | 0.71209        | 0.00009        |
| D5                 | JH56 60 | 0.011 | 0.000700 | 0.199 | 0.144 | 1.72 | 0.0559 | 0.0003 | 0.00668 | 0.00004 | 0.00134 | 0.00008 | 0.71217        | 0.00010        |
| D5                 | JH56 61 | 0.012 | 0.001532 | 0.212 | 0.154 | 1.84 | 0.0560 | 0.0003 | 0.00668 | 0.00003 | 0.00284 | 0.00055 | 0.71210        | 0.00007        |
| D5                 | JH56 62 | 0.009 | 0.000511 | 0.163 | 0.119 | 1.42 | 0.0560 | 0.0004 | 0.00669 | 0.00005 | 0.00118 | 0.00005 | 0.71199        | 0.00010        |
| D5                 | JH56 63 | 0.009 | 0.001302 | 0.161 | 0.117 | 1.40 | 0.0575 | 0.0004 | 0.00686 | 0.00005 | 0.00299 | 0.00017 | 0.71220        | 0.00012        |
| D5                 | JH56 64 | 0.008 | 0.006739 | 0.155 | 0.115 | 1.35 | 0.0572 | 0.0005 | 0.00683 | 0.00006 | 0.01645 | 0.00091 | 0.71221        | 0.00011        |
| D6                 | JH56 65 | 0.008 | 0.006660 | 0.142 | 0.105 | 1.23 | 0.0562 | 0.0005 | 0.00671 | 0.00006 | 0.01828 | 0.00183 | 0.71211        | 0.00011        |
| D6                 | JH56 66 | 0.009 | 0.023589 | 0.163 | 0.128 | 1.42 | 0.0565 | 0.0004 | 0.00674 | 0.00005 | 0.05481 | 0.00109 | 0.71227        | 0.00011        |
| D6                 | JH56 67 | 0.011 | 0.003365 | 0.196 | 0.144 | 1.70 | 0.0565 | 0.0003 | 0.00675 | 0.00004 | 0.00639 | 0.00059 | 0.71216        | 0.00009        |
| D6                 | JH56 68 | 0.011 | 0.002788 | 0.201 | 0.146 | 1.74 | 0.0563 | 0.0003 | 0.00672 | 0.00004 | 0.00509 | 0.00048 | 0.71215        | 0.00010        |
| D6                 | JH56 69 | 0.020 | 0.002721 | 0.370 | 0.269 | 3.21 | 0.0561 | 0.0002 | 0.00670 | 0.00002 | 0.00279 | 0.00022 | 0.71206        | 0.00006        |
| D6                 | JH56 70 | 0.016 | 0.002431 | 0.303 | 0.219 | 2.62 | 0.0562 | 0.0002 | 0.00671 | 0.00003 | 0.00242 | 0.00017 | 0.71211        | 0.00007        |
| D6                 | JH56 71 | 0.025 | 0.032944 | 0.465 | 0.350 | 4.03 | 0.0563 | 0.0001 | 0.00673 | 0.00002 | 0.02692 | 0.00072 | 0.71216        | 0.00005        |
| D6                 | JH56 72 | 0.019 | 0.013780 | 0.356 | 0.263 | 3.09 | 0.0562 | 0.0002 | 0.00671 | 0.00002 | 0.01433 | 0.00040 | 0.71215        | 0.00007        |
| D6                 | JH56 73 | 0.024 | 0.043481 | 0.445 | 0.340 | 3.86 | 0.0564 | 0.0002 | 0.00674 | 0.00002 | 0.03748 | 0.00242 | 0.71219        | 0.00005        |
| D6                 | JH56 74 | 0.008 | 0.001009 | 0.139 | 0.101 | 1.21 | 0.0552 | 0.0005 | 0.00659 | 0.00006 | 0.00271 | 0.00021 | 0.71218        | 0.00012        |
| D6                 | JH56 75 | 0.009 | 0.000573 | 0.162 | 0.117 | 1.40 | 0.0562 | 0.0004 | 0.00671 | 0.00005 | 0.00131 | 0.00008 | 0.71212        | 0.00012        |
| D6                 | JH56 76 | 0.008 | 0.000644 | 0.156 | 0.113 | 1.35 | 0.0568 | 0.0004 | 0.00679 | 0.00005 | 0.00153 | 0.00014 | 0.71212        | 0.00011        |
| D6                 | JH56 77 | 0.008 | 0.002053 | 0.138 | 0.101 | 1.20 | 0.0565 | 0.0005 | 0.00674 | 0.00006 | 0.00549 | 0.00040 | 0.71208        | 0.00010        |
| D6                 | JH56 78 | 0.008 | 0.001129 | 0.154 | 0.112 | 1.34 | 0.0563 | 0.0005 | 0.00672 | 0.00005 | 0.00277 | 0.00013 | 0.71215        | 0.00011        |
| <b>Average/2SD</b> |         |       |          |       |       |      |        |        |         |         |         |         | <b>0.71212</b> | <b>0.00014</b> |

**BDL plagioclase**

|    |          |       |          |       |       |      |        |        |         |         |         |         |         |         |
|----|----------|-------|----------|-------|-------|------|--------|--------|---------|---------|---------|---------|---------|---------|
| D1 | BDL-1 01 | 0.017 | 0.000045 | 0.318 | 0.228 | 2.75 | 0.0563 | 0.0002 | 0.00673 | 0.00002 | 0.00005 | 0.00001 | 0.70537 | 0.00007 |
| D1 | BDL-1 02 | 0.016 | 0.000267 | 0.294 | 0.211 | 2.55 | 0.0562 | 0.0002 | 0.00672 | 0.00002 | 0.00035 | 0.00003 | 0.70542 | 0.00007 |
| D1 | BDL-1 03 | 0.021 | 0.000787 | 0.385 | 0.277 | 3.34 | 0.0561 | 0.0002 | 0.00670 | 0.00002 | 0.00077 | 0.00001 | 0.70533 | 0.00006 |
| D1 | BDL-1 04 | 0.026 | 0.000105 | 0.468 | 0.336 | 4.05 | 0.0565 | 0.0001 | 0.00674 | 0.00002 | 0.00008 | 0.00001 | 0.70536 | 0.00005 |
| D1 | BDL-1 05 | 0.020 | 0.000120 | 0.374 | 0.268 | 3.24 | 0.0563 | 0.0002 | 0.00673 | 0.00002 | 0.00013 | 0.00003 | 0.70527 | 0.00006 |
| D1 | BDL-1 06 | 0.022 | 0.000112 | 0.405 | 0.291 | 3.51 | 0.0562 | 0.0002 | 0.00672 | 0.00002 | 0.00011 | 0.00002 | 0.70532 | 0.00006 |
| D1 | BDL-1 07 | 0.023 | 0.000011 | 0.416 | 0.299 | 3.60 | 0.0560 | 0.0002 | 0.00669 | 0.00002 | 0.00001 | 0.00001 | 0.70528 | 0.00006 |
| D1 | BDL-1 08 | 0.025 | 0.000136 | 0.461 | 0.331 | 3.99 | 0.0562 | 0.0001 | 0.00671 | 0.00002 | 0.00011 | 0.00001 | 0.70532 | 0.00005 |
| D1 | BDL-1 09 | 0.025 | 0.007419 | 0.460 | 0.333 | 3.99 | 0.0564 | 0.0002 | 0.00674 | 0.00002 | 0.00018 | 0.00003 | 0.70537 | 0.00005 |
| D1 | BDL-1 10 | 0.023 | 0.000121 | 0.426 | 0.305 | 3.69 | 0.0565 | 0.0002 | 0.00674 | 0.00002 | 0.00011 | 0.00001 | 0.70537 | 0.00005 |
| D2 | BDL-1 11 | 0.023 | 0.000164 | 0.414 | 0.298 | 3.59 | 0.0564 | 0.0001 | 0.00673 | 0.00002 | 0.00015 | 0.00001 | 0.70537 | 0.00005 |
| D2 | BDL-1 12 | 0.023 | 0.000037 | 0.424 | 0.304 | 3.67 | 0.0564 | 0.0001 | 0.00673 | 0.00002 | 0.00003 | 0.00001 | 0.70532 | 0.00005 |
| D2 | BDL-1 13 | 0.024 | 0.000268 | 0.437 | 0.314 | 3.78 | 0.0565 | 0.0001 | 0.00674 | 0.00002 | 0.00023 | 0.00001 | 0.70535 | 0.00005 |
| D2 | BDL-1 14 | 0.025 | 0.000448 | 0.466 | 0.335 | 4.04 | 0.0564 | 0.0002 | 0.00674 | 0.00002 | 0.00037 | 0.00002 | 0.70534 | 0.00004 |
| D2 | BDL-1 15 | 0.024 | 0.000182 | 0.440 | 0.316 | 3.81 | 0.0562 | 0.0001 | 0.00671 | 0.00002 | 0.00016 | 0.00001 | 0.70534 | 0.00005 |
| D2 | BDL-1 16 | 0.022 | 0.000669 | 0.400 | 0.287 | 3.47 | 0.0563 | 0.0002 | 0.00673 | 0.00002 | 0.00065 | 0.00008 | 0.70540 | 0.00006 |
| D2 | BDL-1 17 | 0.025 | 0.000104 | 0.464 | 0.333 | 4.02 | 0.0562 | 0.0002 | 0.00671 | 0.00002 | 0.00008 | 0.00001 | 0.70536 | 0.00005 |
| D2 | BDL-1 18 | 0.032 | 0.000579 | 0.581 | 0.417 | 5.04 | 0.0563 | 0.0001 | 0.00672 | 0.00001 | 0.00038 | 0.00002 | 0.70535 | 0.00004 |
| D2 | BDL-1 19 | 0.019 | 0.000075 | 0.356 | 0.255 | 3.08 | 0.0562 | 0.0002 | 0.00671 | 0.00002 | 0.00008 | 0.00001 | 0.70530 | 0.00006 |
| D2 | BDL-1 20 | 0.022 | 0.000024 | 0.408 | 0.293 | 3.53 | 0.0564 | 0.0002 | 0.00673 | 0.00002 | 0.00002 | 0.00001 | 0.70536 | 0.00005 |
| D3 | BDL-1 21 | 0.023 | 0.000219 | 0.425 | 0.305 | 3.69 | 0.0563 | 0.0002 | 0.00673 | 0.00002 | 0.00020 | 0.00001 | 0.70541 | 0.00005 |
| D3 | BDL-1 22 | 0.025 | 0.000049 | 0.456 | 0.327 | 3.95 | 0.0564 | 0.0001 | 0.00674 | 0.00002 | 0.00004 | 0.00001 | 0.70534 | 0.00005 |
| D3 | BDL-1 23 | 0.021 | 0.000016 | 0.379 | 0.272 | 3.28 | 0.0563 | 0.0001 | 0.00673 | 0.00002 | 0.00002 | 0.00001 | 0.70538 | 0.00005 |
| D3 | BDL-1 24 | 0.025 | 0.000062 | 0.463 | 0.332 | 4.01 | 0.0564 | 0.0001 | 0.00673 | 0.00002 | 0.00005 | 0.00001 | 0.70538 | 0.00005 |
| D3 | BDL-1 25 | 0.027 | 0.000131 | 0.490 | 0.352 | 4.24 | 0.0563 | 0.0001 | 0.00672 | 0.00002 | 0.00010 | 0.00001 | 0.70535 | 0.00005 |
| D3 | BDL-1 26 | 0.023 | 0.000052 | 0.419 | 0.300 | 3.62 | 0.0564 | 0.0002 | 0.00673 | 0.00002 | 0.00005 | 0.00001 | 0.70541 | 0.00005 |

|    |          |       |          |       |       |      |        |        |         |         |         |         |         |         |
|----|----------|-------|----------|-------|-------|------|--------|--------|---------|---------|---------|---------|---------|---------|
| D3 | BDL-1 27 | 0.024 | 0.000190 | 0.434 | 0.311 | 3.76 | 0.0563 | 0.0001 | 0.00672 | 0.00002 | 0.00016 | 0.00003 | 0.70539 | 0.00005 |
| D3 | BDL-1 28 | 0.027 | 0.000104 | 0.493 | 0.354 | 4.27 | 0.0565 | 0.0001 | 0.00674 | 0.00001 | 0.00008 | 0.00001 | 0.70533 | 0.00005 |
| D3 | BDL-1 29 | 0.021 | 0.000044 | 0.394 | 0.282 | 3.41 | 0.0564 | 0.0001 | 0.00673 | 0.00002 | 0.00004 | 0.00001 | 0.70542 | 0.00006 |
| D3 | BDL-1 30 | 0.023 | 0.000014 | 0.417 | 0.299 | 3.61 | 0.0563 | 0.0001 | 0.00672 | 0.00002 | 0.00001 | 0.00001 | 0.70541 | 0.00005 |
| D3 | BDL-1 31 | 0.021 | 0.000002 | 0.385 | 0.276 | 3.33 | 0.0565 | 0.0002 | 0.00675 | 0.00002 | 0.00000 | 0.00001 | 0.70539 | 0.00006 |
| D3 | BDL-1 32 | 0.023 | 0.000252 | 0.421 | 0.302 | 3.65 | 0.0565 | 0.0001 | 0.00674 | 0.00002 | 0.00023 | 0.00001 | 0.70537 | 0.00005 |
| D4 | BDL-1 33 | 0.023 | 0.000146 | 0.422 | 0.303 | 3.66 | 0.0563 | 0.0002 | 0.00672 | 0.00002 | 0.00013 | 0.00001 | 0.70538 | 0.00005 |
| D4 | BDL-1 34 | 0.023 | 0.000023 | 0.416 | 0.299 | 3.61 | 0.0563 | 0.0001 | 0.00673 | 0.00002 | 0.00002 | 0.00001 | 0.70539 | 0.00005 |
| D4 | BDL-1 35 | 0.024 | 0.000026 | 0.436 | 0.313 | 3.78 | 0.0564 | 0.0001 | 0.00673 | 0.00002 | 0.00002 | 0.00001 | 0.70541 | 0.00005 |
| D4 | BDL-1 36 | 0.024 | 0.000087 | 0.441 | 0.316 | 3.82 | 0.0561 | 0.0002 | 0.00670 | 0.00002 | 0.00008 | 0.00001 | 0.70534 | 0.00005 |
| D4 | BDL-1 37 | 0.020 | 0.000019 | 0.376 | 0.270 | 3.26 | 0.0564 | 0.0002 | 0.00673 | 0.00002 | 0.00002 | 0.00001 | 0.70542 | 0.00005 |
| D4 | BDL-1 38 | 0.020 | 0.000070 | 0.375 | 0.269 | 3.25 | 0.0564 | 0.0002 | 0.00674 | 0.00002 | 0.00008 | 0.00001 | 0.70544 | 0.00005 |
| D4 | BDL-1 39 | 0.022 | 0.000046 | 0.397 | 0.285 | 3.44 | 0.0564 | 0.0001 | 0.00673 | 0.00002 | 0.00004 | 0.00001 | 0.70539 | 0.00005 |
| D4 | BDL-1 40 | 0.013 | 0.000197 | 0.236 | 0.169 | 2.04 | 0.0564 | 0.0003 | 0.00674 | 0.00003 | 0.00032 | 0.00002 | 0.70541 | 0.00008 |
| D4 | BDL-1 41 | 0.018 | 0.000121 | 0.333 | 0.239 | 2.89 | 0.0564 | 0.0002 | 0.00673 | 0.00002 | 0.00014 | 0.00001 | 0.70537 | 0.00006 |
| D4 | BDL-1 42 | 0.021 | 0.000081 | 0.384 | 0.275 | 3.32 | 0.0562 | 0.0002 | 0.00671 | 0.00002 | 0.00008 | 0.00001 | 0.70531 | 0.00006 |
| D4 | BDL-1 43 | 0.023 | 0.000198 | 0.423 | 0.303 | 3.66 | 0.0563 | 0.0001 | 0.00673 | 0.00002 | 0.00018 | 0.00002 | 0.70531 | 0.00005 |
| D4 | BDL-1 44 | 0.020 | 0.000059 | 0.364 | 0.261 | 3.16 | 0.0565 | 0.0002 | 0.00674 | 0.00002 | 0.00006 | 0.00001 | 0.70538 | 0.00005 |
| D4 | BDL-1 45 | 0.020 | 0.000261 | 0.359 | 0.257 | 3.11 | 0.0564 | 0.0002 | 0.00673 | 0.00002 | 0.00028 | 0.00001 | 0.70540 | 0.00006 |
| D5 | BDL-1 46 | 0.019 | 0.000044 | 0.352 | 0.253 | 3.05 | 0.0562 | 0.0002 | 0.00671 | 0.00002 | 0.00005 | 0.00001 | 0.70532 | 0.00006 |
| D5 | BDL-1 47 | 0.017 | 0.000166 | 0.316 | 0.227 | 2.74 | 0.0564 | 0.0002 | 0.00673 | 0.00002 | 0.00019 | 0.00002 | 0.70537 | 0.00006 |
| D5 | BDL-1 48 | 0.021 | 0.000012 | 0.384 | 0.276 | 3.33 | 0.0564 | 0.0002 | 0.00673 | 0.00002 | 0.00001 | 0.00001 | 0.70537 | 0.00006 |
| D5 | BDL-1 49 | 0.020 | 0.000099 | 0.361 | 0.259 | 3.13 | 0.0565 | 0.0002 | 0.00674 | 0.00002 | 0.00010 | 0.00002 | 0.70535 | 0.00005 |
| D5 | BDL-1 50 | 0.021 | 0.000117 | 0.379 | 0.272 | 3.28 | 0.0560 | 0.0002 | 0.00668 | 0.00002 | 0.00012 | 0.00001 | 0.70536 | 0.00005 |
| D5 | BDL-1 51 | 0.021 | 0.000183 | 0.382 | 0.274 | 3.31 | 0.0563 | 0.0002 | 0.00672 | 0.00002 | 0.00018 | 0.00001 | 0.70534 | 0.00006 |
| D5 | BDL-1 52 | 0.021 | 0.000464 | 0.384 | 0.276 | 3.33 | 0.0563 | 0.0002 | 0.00672 | 0.00002 | 0.00045 | 0.00005 | 0.70541 | 0.00006 |

|                    |          |       |          |       |       |      |        |        |         |         |         |         |                |                |
|--------------------|----------|-------|----------|-------|-------|------|--------|--------|---------|---------|---------|---------|----------------|----------------|
| D5                 | BDL-1 53 | 0.020 | 0.000018 | 0.367 | 0.263 | 3.18 | 0.0565 | 0.0002 | 0.00675 | 0.00002 | 0.00002 | 0.00001 | 0.70531        | 0.00006        |
| D5                 | BDL-1 54 | 0.024 | 0.000223 | 0.441 | 0.317 | 3.82 | 0.0563 | 0.0002 | 0.00672 | 0.00002 | 0.00019 | 0.00001 | 0.70538        | 0.00005        |
| D5                 | BDL-1 55 | 0.021 | 0.000032 | 0.384 | 0.275 | 3.32 | 0.0565 | 0.0002 | 0.00675 | 0.00002 | 0.00003 | 0.00001 | 0.70536        | 0.00005        |
| D5                 | BDL-1 56 | 0.021 | 0.000060 | 0.383 | 0.275 | 3.32 | 0.0563 | 0.0002 | 0.00672 | 0.00002 | 0.00006 | 0.00001 | 0.70539        | 0.00005        |
| D5                 | BDL-1 57 | 0.022 | 0.000049 | 0.401 | 0.288 | 3.47 | 0.0565 | 0.0002 | 0.00675 | 0.00002 | 0.00005 | 0.00001 | 0.70538        | 0.00005        |
| D5                 | BDL-1 58 | 0.022 | 0.000025 | 0.398 | 0.285 | 3.45 | 0.0564 | 0.0001 | 0.00674 | 0.00002 | 0.00002 | 0.00001 | 0.70539        | 0.00006        |
| D6                 | BDL-1 59 | 0.022 | 0.000457 | 0.400 | 0.287 | 3.46 | 0.0560 | 0.0002 | 0.00669 | 0.00002 | 0.00045 | 0.00006 | 0.70533        | 0.00005        |
| D6                 | BDL-1 60 | 0.022 | 0.000069 | 0.395 | 0.283 | 3.42 | 0.0564 | 0.0002 | 0.00673 | 0.00002 | 0.00007 | 0.00001 | 0.70531        | 0.00006        |
| D6                 | BDL-1 61 | 0.022 | 0.000050 | 0.398 | 0.286 | 3.45 | 0.0564 | 0.0002 | 0.00673 | 0.00002 | 0.00005 | 0.00001 | 0.70533        | 0.00005        |
| D6                 | BDL-1 62 | 0.023 | 0.000512 | 0.424 | 0.305 | 3.67 | 0.0566 | 0.0001 | 0.00676 | 0.00002 | 0.00046 | 0.00003 | 0.70535        | 0.00006        |
| D6                 | BDL-1 63 | 0.024 | 0.000127 | 0.436 | 0.313 | 3.77 | 0.0563 | 0.0002 | 0.00672 | 0.00002 | 0.00011 | 0.00001 | 0.70536        | 0.00005        |
| D6                 | BDL-1 64 | 0.026 | 0.000159 | 0.470 | 0.337 | 4.07 | 0.0561 | 0.0001 | 0.00670 | 0.00002 | 0.00012 | 0.00002 | 0.70528        | 0.00005        |
| D6                 | BDL-1 65 | 0.022 | 0.000024 | 0.399 | 0.286 | 3.46 | 0.0565 | 0.0002 | 0.00675 | 0.00002 | 0.00002 | 0.00001 | 0.70533        | 0.00005        |
| D6                 | BDL-1 66 | 0.024 | 0.000162 | 0.444 | 0.319 | 3.84 | 0.0562 | 0.0001 | 0.00671 | 0.00001 | 0.00014 | 0.00001 | 0.70537        | 0.00005        |
| D6                 | BDL-1 67 | 0.025 | 0.000100 | 0.451 | 0.323 | 3.90 | 0.0563 | 0.0001 | 0.00672 | 0.00002 | 0.00008 | 0.00001 | 0.70535        | 0.00005        |
| D6                 | BDL-1 68 | 0.024 | 0.000143 | 0.435 | 0.312 | 3.77 | 0.0561 | 0.0001 | 0.00670 | 0.00002 | 0.00013 | 0.00001 | 0.70529        | 0.00005        |
| D6                 | BDL-1 69 | 0.021 | 0.000159 | 0.388 | 0.278 | 3.36 | 0.0563 | 0.0002 | 0.00673 | 0.00002 | 0.00016 | 0.00002 | 0.70537        | 0.00006        |
| D6                 | BDL-1 70 | 0.023 | 0.000080 | 0.425 | 0.305 | 3.68 | 0.0567 | 0.0002 | 0.00677 | 0.00002 | 0.00007 | 0.00001 | 0.70538        | 0.00005        |
| D6                 | BDL-1 71 | 0.024 | 0.000018 | 0.433 | 0.311 | 3.75 | 0.0565 | 0.0001 | 0.00675 | 0.00002 | 0.00002 | 0.00001 | 0.70536        | 0.00005        |
| D6                 | BDL-1 72 | 0.024 | 0.000075 | 0.437 | 0.314 | 3.79 | 0.0564 | 0.0002 | 0.00674 | 0.00002 | 0.00007 | 0.00001 | 0.70538        | 0.00005        |
| <b>Average/2SD</b> |          |       |          |       |       |      |        |        |         |         |         |         | <b>0.70536</b> | <b>0.00008</b> |
| D1                 | BDL-2_01 | 0.020 | 0.000183 | 0.365 | 0.262 | 3.16 | 0.0564 | 0.0002 | 0.00673 | 0.00002 | 0.00019 | 0.00002 | 0.70536        | 0.00005        |
| D1                 | BDL-2_02 | 0.022 | 0.000136 | 0.401 | 0.288 | 3.47 | 0.0564 | 0.0002 | 0.00674 | 0.00002 | 0.00013 | 0.00001 | 0.70538        | 0.00005        |
| D1                 | BDL-2_03 | 0.022 | 0.000162 | 0.401 | 0.288 | 3.47 | 0.0564 | 0.0001 | 0.00673 | 0.00002 | 0.00015 | 0.00001 | 0.70534        | 0.00005        |
| D1                 | BDL-2_04 | 0.025 | 0.000350 | 0.449 | 0.322 | 3.88 | 0.0564 | 0.0001 | 0.00673 | 0.00002 | 0.00030 | 0.00001 | 0.70531        | 0.00005        |
| D1                 | BDL-2_05 | 0.020 | 0.000459 | 0.373 | 0.268 | 3.23 | 0.0565 | 0.0002 | 0.00674 | 0.00002 | 0.00046 | 0.00007 | 0.70541        | 0.00005        |

|    |          |       |          |       |       |      |        |        |         |         |         |         |         |         |
|----|----------|-------|----------|-------|-------|------|--------|--------|---------|---------|---------|---------|---------|---------|
| D1 | BDL-2_06 | 0.024 | 0.000142 | 0.441 | 0.316 | 3.82 | 0.0564 | 0.0001 | 0.00673 | 0.00002 | 0.00012 | 0.00001 | 0.70534 | 0.00005 |
| D1 | BDL-2_07 | 0.022 | 0.000305 | 0.407 | 0.292 | 3.52 | 0.0562 | 0.0001 | 0.00671 | 0.00002 | 0.00029 | 0.00005 | 0.70536 | 0.00005 |
| D1 | BDL-2_08 | 0.022 | 0.000155 | 0.404 | 0.290 | 3.50 | 0.0564 | 0.0001 | 0.00673 | 0.00002 | 0.00015 | 0.00001 | 0.70529 | 0.00005 |
| D1 | BDL-2_09 | 0.024 | 0.000539 | 0.441 | 0.316 | 3.82 | 0.0563 | 0.0002 | 0.00672 | 0.00002 | 0.00046 | 0.00005 | 0.70532 | 0.00005 |
| D1 | BDL-2_10 | 0.022 | 0.000081 | 0.412 | 0.295 | 3.56 | 0.0561 | 0.0001 | 0.00670 | 0.00002 | 0.00008 | 0.00001 | 0.70529 | 0.00004 |
| D2 | BDL-2_11 | 0.026 | 0.003458 | 0.470 | 0.338 | 4.06 | 0.0564 | 0.0001 | 0.00674 | 0.00002 | 0.00275 | 0.00024 | 0.70539 | 0.00005 |
| D2 | BDL-2_12 | 0.019 | 0.000364 | 0.352 | 0.252 | 3.04 | 0.0566 | 0.0002 | 0.00675 | 0.00002 | 0.00039 | 0.00002 | 0.70535 | 0.00007 |
| D2 | BDL-2_13 | 0.022 | 0.000070 | 0.401 | 0.288 | 3.47 | 0.0564 | 0.0002 | 0.00674 | 0.00002 | 0.00007 | 0.00001 | 0.70538 | 0.00004 |
| D2 | BDL-2_14 | 0.023 | 0.000589 | 0.418 | 0.300 | 3.62 | 0.0563 | 0.0002 | 0.00672 | 0.00002 | 0.00054 | 0.00004 | 0.70539 | 0.00005 |
| D2 | BDL-2_15 | 0.023 | 0.001089 | 0.429 | 0.308 | 3.71 | 0.0564 | 0.0002 | 0.00673 | 0.00002 | 0.00093 | 0.00013 | 0.70536 | 0.00006 |
| D2 | BDL-2_16 | 0.025 | 0.000044 | 0.462 | 0.331 | 4.00 | 0.0564 | 0.0001 | 0.00674 | 0.00002 | 0.00004 | 0.00001 | 0.70535 | 0.00005 |
| D2 | BDL-2_17 | 0.016 | 0.000074 | 0.290 | 0.208 | 2.51 | 0.0564 | 0.0003 | 0.00674 | 0.00003 | 0.00012 | 0.00005 | 0.70531 | 0.00010 |
| D2 | BDL-2_18 | 0.022 | 0.000070 | 0.399 | 0.286 | 3.46 | 0.0565 | 0.0002 | 0.00674 | 0.00002 | 0.00007 | 0.00001 | 0.70539 | 0.00005 |
| D2 | BDL-2_19 | 0.025 | 0.000206 | 0.462 | 0.332 | 4.00 | 0.0561 | 0.0001 | 0.00670 | 0.00002 | 0.00017 | 0.00002 | 0.70528 | 0.00004 |
| D2 | BDL-2_20 | 0.028 | 0.003097 | 0.505 | 0.363 | 4.37 | 0.0564 | 0.0001 | 0.00673 | 0.00002 | 0.00228 | 0.00018 | 0.70536 | 0.00004 |
| D3 | BDL-2_21 | 0.013 | 0.000041 | 0.237 | 0.170 | 2.05 | 0.0565 | 0.0003 | 0.00675 | 0.00003 | 0.00007 | 0.00001 | 0.70539 | 0.00009 |
| D3 | BDL-2_22 | 0.013 | 0.000100 | 0.250 | 0.179 | 2.17 | 0.0564 | 0.0002 | 0.00674 | 0.00003 | 0.00015 | 0.00001 | 0.70533 | 0.00007 |
| D3 | BDL-2_23 | 0.015 | 0.000072 | 0.277 | 0.199 | 2.40 | 0.0561 | 0.0002 | 0.00669 | 0.00003 | 0.00010 | 0.00001 | 0.70534 | 0.00007 |
| D3 | BDL-2_24 | 0.015 | 0.000077 | 0.282 | 0.203 | 2.45 | 0.0563 | 0.0002 | 0.00673 | 0.00003 | 0.00010 | 0.00001 | 0.70541 | 0.00007 |
| D3 | BDL-2_25 | 0.018 | 0.000148 | 0.343 | 0.246 | 2.98 | 0.0565 | 0.0002 | 0.00675 | 0.00002 | 0.00016 | 0.00001 | 0.70541 | 0.00007 |
| D3 | BDL-2_26 | 0.017 | 0.000149 | 0.321 | 0.231 | 2.79 | 0.0564 | 0.0002 | 0.00673 | 0.00002 | 0.00017 | 0.00001 | 0.70535 | 0.00006 |
| D3 | BDL-2_27 | 0.018 | 0.000100 | 0.331 | 0.238 | 2.87 | 0.0566 | 0.0002 | 0.00675 | 0.00002 | 0.00011 | 0.00001 | 0.70540 | 0.00005 |
| D3 | BDL-2_28 | 0.021 | 0.000171 | 0.386 | 0.277 | 3.34 | 0.0563 | 0.0002 | 0.00672 | 0.00002 | 0.00017 | 0.00002 | 0.70529 | 0.00005 |
| D3 | BDL-2_29 | 0.020 | 0.000329 | 0.375 | 0.269 | 3.25 | 0.0566 | 0.0002 | 0.00676 | 0.00002 | 0.00033 | 0.00002 | 0.70536 | 0.00005 |
| D3 | BDL-2_30 | 0.023 | 0.000073 | 0.421 | 0.302 | 3.65 | 0.0563 | 0.0002 | 0.00672 | 0.00002 | 0.00007 | 0.00001 | 0.70526 | 0.00005 |
| D4 | BDL-2_31 | 0.023 | 0.000165 | 0.418 | 0.300 | 3.62 | 0.0562 | 0.0001 | 0.00671 | 0.00002 | 0.00015 | 0.00001 | 0.70540 | 0.00005 |

|    |                    |       |          |       |       |      |        |        |         |         |         |         |                |                |
|----|--------------------|-------|----------|-------|-------|------|--------|--------|---------|---------|---------|---------|----------------|----------------|
| D4 | BDL-2_32           | 0.022 | 0.000326 | 0.396 | 0.284 | 3.43 | 0.0560 | 0.0002 | 0.00669 | 0.00002 | 0.00031 | 0.00002 | 0.70528        | 0.00006        |
| D4 | BDL-2_33           | 0.021 | 0.000381 | 0.393 | 0.282 | 3.40 | 0.0561 | 0.0002 | 0.00670 | 0.00002 | 0.00036 | 0.00002 | 0.70531        | 0.00005        |
| D4 | BDL-2_34           | 0.023 | 0.000951 | 0.420 | 0.301 | 3.63 | 0.0565 | 0.0001 | 0.00674 | 0.00002 | 0.00085 | 0.00007 | 0.70536        | 0.00005        |
| D4 | BDL-2_35           | 0.023 | 0.000181 | 0.424 | 0.304 | 3.67 | 0.0563 | 0.0002 | 0.00672 | 0.00002 | 0.00016 | 0.00001 | 0.70535        | 0.00005        |
| D4 | BDL-2_36           | 0.025 | 0.001957 | 0.461 | 0.332 | 3.99 | 0.0563 | 0.0001 | 0.00673 | 0.00002 | 0.00160 | 0.00004 | 0.70533        | 0.00005        |
| D4 | BDL-2_37           | 0.023 | 0.001320 | 0.428 | 0.308 | 3.71 | 0.0561 | 0.0001 | 0.00669 | 0.00002 | 0.00113 | 0.00013 | 0.70529        | 0.00005        |
| D4 | BDL-2_38           | 0.023 | 0.000153 | 0.415 | 0.298 | 3.59 | 0.0563 | 0.0001 | 0.00672 | 0.00002 | 0.00014 | 0.00001 | 0.70531        | 0.00005        |
| D4 | BDL-2_39           | 0.023 | 0.000064 | 0.421 | 0.302 | 3.65 | 0.0562 | 0.0002 | 0.00671 | 0.00002 | 0.00006 | 0.00001 | 0.70538        | 0.00005        |
| D4 | BDL-2_40           | 0.023 | 0.002239 | 0.413 | 0.297 | 3.57 | 0.0562 | 0.0002 | 0.00671 | 0.00002 | 0.00207 | 0.00011 | 0.70533        | 0.00005        |
| D5 | BDL-2_41           | 0.020 | 0.001295 | 0.367 | 0.264 | 3.18 | 0.0566 | 0.0002 | 0.00675 | 0.00002 | 0.00132 | 0.00013 | 0.70538        | 0.00006        |
| D5 | BDL-2_42           | 0.015 | 0.000104 | 0.270 | 0.194 | 2.34 | 0.0560 | 0.0003 | 0.00669 | 0.00003 | 0.00015 | 0.00001 | 0.70526        | 0.00007        |
| D5 | BDL-2_43           | 0.017 | 0.000945 | 0.319 | 0.229 | 2.76 | 0.0564 | 0.0002 | 0.00673 | 0.00003 | 0.00116 | 0.00007 | 0.70531        | 0.00007        |
| D5 | BDL-2_44           | 0.013 | 0.001227 | 0.239 | 0.172 | 2.07 | 0.0563 | 0.0003 | 0.00672 | 0.00004 | 0.00195 | 0.00013 | 0.70531        | 0.00007        |
| D5 | BDL-2_45           | 0.018 | 0.000197 | 0.335 | 0.240 | 2.90 | 0.0563 | 0.0002 | 0.00672 | 0.00002 | 0.00022 | 0.00002 | 0.70537        | 0.00006        |
| D5 | BDL-2_46           | 0.021 | 0.000128 | 0.391 | 0.281 | 3.39 | 0.0562 | 0.0002 | 0.00672 | 0.00002 | 0.00012 | 0.00001 | 0.70529        | 0.00006        |
| D5 | BDL-2_47           | 0.028 | 0.000532 | 0.506 | 0.363 | 4.38 | 0.0566 | 0.0001 | 0.00676 | 0.00002 | 0.00039 | 0.00008 | 0.70542        | 0.00005        |
| D5 | BDL-2_48           | 0.020 | 0.000152 | 0.370 | 0.266 | 3.21 | 0.0561 | 0.0002 | 0.00670 | 0.00002 | 0.00015 | 0.00001 | 0.70535        | 0.00006        |
| D5 | BDL-2_49           | 0.020 | 0.000170 | 0.375 | 0.269 | 3.24 | 0.0564 | 0.0002 | 0.00674 | 0.00002 | 0.00017 | 0.00002 | 0.70536        | 0.00005        |
| D5 | BDL-2_50           | 0.023 | 0.000169 | 0.423 | 0.304 | 3.67 | 0.0561 | 0.0002 | 0.00669 | 0.00002 | 0.00015 | 0.00001 | 0.70529        | 0.00005        |
|    | <b>Average/2SD</b> |       |          |       |       |      |        |        |         |         |         |         | <b>0.70534</b> | <b>0.00009</b> |
| D1 | BDL-3 01           | 0.024 | 0.000383 | 0.439 | 0.315 | 3.80 | 0.0562 | 0.0001 | 0.00671 | 0.00002 | 0.00033 | 0.00001 | 0.70538        | 0.00005        |
| D1 | BDL-3 02           | 0.023 | 0.000039 | 0.425 | 0.305 | 3.68 | 0.0559 | 0.0001 | 0.00668 | 0.00002 | 0.00003 | 0.00001 | 0.70531        | 0.00005        |
| D1 | BDL-3 03           | 0.026 | 0.000064 | 0.466 | 0.335 | 4.04 | 0.0564 | 0.0001 | 0.00673 | 0.00001 | 0.00005 | 0.00001 | 0.70532        | 0.00005        |
| D1 | BDL-3 04           | 0.026 | 0.000591 | 0.481 | 0.345 | 4.16 | 0.0564 | 0.0001 | 0.00674 | 0.00002 | 0.00048 | 0.00008 | 0.70534        | 0.00004        |
| D1 | BDL-3 05           | 0.025 | 0.001851 | 0.456 | 0.328 | 3.95 | 0.0563 | 0.0001 | 0.00673 | 0.00002 | 0.00155 | 0.00009 | 0.70533        | 0.00005        |
| D1 | BDL-3 06           | 0.025 | 0.000895 | 0.453 | 0.325 | 3.92 | 0.0562 | 0.0001 | 0.00671 | 0.00002 | 0.00075 | 0.00001 | 0.70534        | 0.00005        |

|    |          |       |          |       |       |      |        |        |         |         |         |         |         |         |
|----|----------|-------|----------|-------|-------|------|--------|--------|---------|---------|---------|---------|---------|---------|
| D1 | BDL-3 07 | 0.026 | 0.000119 | 0.477 | 0.342 | 4.13 | 0.0564 | 0.0001 | 0.00673 | 0.00002 | 0.00009 | 0.00001 | 0.70534 | 0.00004 |
| D1 | BDL-3 08 | 0.027 | 0.002382 | 0.492 | 0.354 | 4.26 | 0.0564 | 0.0001 | 0.00674 | 0.00002 | 0.00186 | 0.00026 | 0.70535 | 0.00005 |
| D1 | BDL-3 09 | 0.025 | 0.000499 | 0.457 | 0.328 | 3.96 | 0.0561 | 0.0001 | 0.00670 | 0.00002 | 0.00041 | 0.00001 | 0.70536 | 0.00005 |
| D1 | BDL-3 10 | 0.023 | 0.000181 | 0.422 | 0.303 | 3.65 | 0.0566 | 0.0002 | 0.00675 | 0.00002 | 0.00016 | 0.00004 | 0.70534 | 0.00005 |
| D1 | BDL-3 11 | 0.025 | 0.001826 | 0.456 | 0.328 | 3.95 | 0.0564 | 0.0001 | 0.00673 | 0.00002 | 0.00152 | 0.00005 | 0.70537 | 0.00004 |
| D1 | BDL-3 12 | 0.026 | 0.000168 | 0.473 | 0.339 | 4.09 | 0.0562 | 0.0002 | 0.00671 | 0.00002 | 0.00013 | 0.00001 | 0.70532 | 0.00005 |
| D1 | BDL-3 13 | 0.028 | 0.000132 | 0.506 | 0.363 | 4.38 | 0.0563 | 0.0001 | 0.00672 | 0.00002 | 0.00010 | 0.00001 | 0.70536 | 0.00005 |
| D1 | BDL-3 14 | 0.026 | 0.000153 | 0.480 | 0.345 | 4.16 | 0.0563 | 0.0001 | 0.00672 | 0.00002 | 0.00012 | 0.00001 | 0.70541 | 0.00004 |
| D1 | BDL-3 15 | 0.025 | 0.000211 | 0.460 | 0.330 | 3.98 | 0.0563 | 0.0001 | 0.00673 | 0.00002 | 0.00017 | 0.00002 | 0.70533 | 0.00005 |
| D2 | BDL-3 16 | 0.024 | 0.001064 | 0.437 | 0.314 | 3.79 | 0.0563 | 0.0002 | 0.00673 | 0.00002 | 0.00091 | 0.00007 | 0.70532 | 0.00005 |
| D2 | BDL-3 17 | 0.029 | 0.002596 | 0.526 | 0.378 | 4.55 | 0.0563 | 0.0001 | 0.00672 | 0.00002 | 0.00183 | 0.00014 | 0.70536 | 0.00004 |
| D2 | BDL-3 18 | 0.026 | 0.000538 | 0.478 | 0.343 | 4.14 | 0.0564 | 0.0001 | 0.00673 | 0.00002 | 0.00042 | 0.00002 | 0.70534 | 0.00005 |
| D2 | BDL-3 19 | 0.026 | 0.000334 | 0.475 | 0.341 | 4.11 | 0.0565 | 0.0001 | 0.00674 | 0.00002 | 0.00027 | 0.00001 | 0.70536 | 0.00004 |
| D2 | BDL-3 20 | 0.028 | 0.000881 | 0.516 | 0.371 | 4.47 | 0.0562 | 0.0001 | 0.00672 | 0.00002 | 0.00065 | 0.00003 | 0.70534 | 0.00004 |
| D2 | BDL-3 21 | 0.026 | 0.000048 | 0.468 | 0.336 | 4.05 | 0.0563 | 0.0001 | 0.00673 | 0.00002 | 0.00004 | 0.00001 | 0.70539 | 0.00005 |
| D2 | BDL-3 22 | 0.025 | 0.000991 | 0.462 | 0.332 | 4.00 | 0.0566 | 0.0001 | 0.00675 | 0.00002 | 0.00081 | 0.00004 | 0.70534 | 0.00005 |
| D2 | BDL-3 23 | 0.030 | 0.000101 | 0.550 | 0.394 | 4.76 | 0.0562 | 0.0001 | 0.00671 | 0.00001 | 0.00007 | 0.00001 | 0.70530 | 0.00004 |
| D2 | BDL-3 24 | 0.030 | 0.000723 | 0.558 | 0.400 | 4.83 | 0.0565 | 0.0001 | 0.00674 | 0.00001 | 0.00047 | 0.00006 | 0.70535 | 0.00004 |
| D2 | BDL-3 25 | 0.021 | 0.000539 | 0.380 | 0.273 | 3.29 | 0.0560 | 0.0002 | 0.00669 | 0.00002 | 0.00054 | 0.00001 | 0.70535 | 0.00006 |
| D3 | BDL-3 26 | 0.027 | 0.000446 | 0.488 | 0.350 | 4.23 | 0.0562 | 0.0001 | 0.00671 | 0.00001 | 0.00035 | 0.00002 | 0.70532 | 0.00005 |
| D3 | BDL-3 27 | 0.026 | 0.000298 | 0.475 | 0.341 | 4.11 | 0.0564 | 0.0001 | 0.00673 | 0.00002 | 0.00024 | 0.00001 | 0.70537 | 0.00004 |
| D3 | BDL-3 28 | 0.026 | 0.001039 | 0.473 | 0.339 | 4.09 | 0.0564 | 0.0001 | 0.00674 | 0.00002 | 0.00084 | 0.00002 | 0.70536 | 0.00005 |
| D3 | BDL-3 29 | 0.026 | 0.000162 | 0.469 | 0.336 | 4.06 | 0.0564 | 0.0001 | 0.00673 | 0.00002 | 0.00013 | 0.00001 | 0.70535 | 0.00005 |
| D3 | BDL-3 30 | 0.021 | 0.001540 | 0.380 | 0.273 | 3.29 | 0.0562 | 0.0002 | 0.00671 | 0.00002 | 0.00153 | 0.00017 | 0.70536 | 0.00006 |
| D3 | BDL-3 31 | 0.021 | 0.001227 | 0.384 | 0.276 | 3.32 | 0.0565 | 0.0002 | 0.00674 | 0.00002 | 0.00124 | 0.00023 | 0.70536 | 0.00005 |
| D3 | BDL-3 32 | 0.022 | 0.000130 | 0.394 | 0.283 | 3.41 | 0.0564 | 0.0002 | 0.00673 | 0.00002 | 0.00012 | 0.00001 | 0.70538 | 0.00005 |

|    |          |       |          |       |       |      |        |        |         |         |         |         |         |         |
|----|----------|-------|----------|-------|-------|------|--------|--------|---------|---------|---------|---------|---------|---------|
| D3 | BDL-3 33 | 0.021 | 0.002892 | 0.376 | 0.271 | 3.26 | 0.0561 | 0.0002 | 0.00670 | 0.00002 | 0.00291 | 0.00003 | 0.70534 | 0.00006 |
| D3 | BDL-3 34 | 0.022 | 0.000221 | 0.400 | 0.287 | 3.47 | 0.0564 | 0.0002 | 0.00673 | 0.00002 | 0.00021 | 0.00001 | 0.70532 | 0.00006 |
| D3 | BDL-3 35 | 0.022 | 0.000226 | 0.395 | 0.283 | 3.42 | 0.0562 | 0.0002 | 0.00671 | 0.00002 | 0.00022 | 0.00001 | 0.70530 | 0.00006 |
| D3 | BDL-3 36 | 0.022 | 0.000489 | 0.396 | 0.284 | 3.43 | 0.0564 | 0.0002 | 0.00674 | 0.00002 | 0.00047 | 0.00002 | 0.70531 | 0.00006 |
| D3 | BDL-3 37 | 0.022 | 0.000212 | 0.397 | 0.285 | 3.44 | 0.0563 | 0.0002 | 0.00672 | 0.00002 | 0.00020 | 0.00001 | 0.70533 | 0.00006 |
| D3 | BDL-3 38 | 0.023 | 0.001220 | 0.412 | 0.296 | 3.57 | 0.0562 | 0.0002 | 0.00671 | 0.00002 | 0.00112 | 0.00003 | 0.70533 | 0.00005 |
| D3 | BDL-3 39 | 0.021 | 0.000275 | 0.386 | 0.277 | 3.35 | 0.0563 | 0.0002 | 0.00672 | 0.00002 | 0.00027 | 0.00001 | 0.70533 | 0.00005 |
| D3 | BDL-3 40 | 0.020 | 0.000587 | 0.373 | 0.268 | 3.23 | 0.0562 | 0.0002 | 0.00671 | 0.00002 | 0.00060 | 0.00004 | 0.70533 | 0.00006 |
| D4 | BDL-3 41 | 0.018 | 0.004054 | 0.335 | 0.242 | 2.90 | 0.0562 | 0.0002 | 0.00671 | 0.00002 | 0.00460 | 0.00018 | 0.70536 | 0.00006 |
| D4 | BDL-3 42 | 0.024 | 0.000184 | 0.442 | 0.318 | 3.83 | 0.0564 | 0.0002 | 0.00674 | 0.00002 | 0.00016 | 0.00001 | 0.70533 | 0.00005 |
| D4 | BDL-3 43 | 0.022 | 0.000299 | 0.397 | 0.285 | 3.44 | 0.0565 | 0.0002 | 0.00674 | 0.00002 | 0.00028 | 0.00002 | 0.70531 | 0.00006 |
| D4 | BDL-3 44 | 0.021 | 0.000158 | 0.384 | 0.276 | 3.33 | 0.0564 | 0.0002 | 0.00674 | 0.00002 | 0.00016 | 0.00001 | 0.70533 | 0.00005 |
| D4 | BDL-3 45 | 0.020 | 0.000350 | 0.374 | 0.269 | 3.25 | 0.0561 | 0.0002 | 0.00670 | 0.00002 | 0.00035 | 0.00001 | 0.70532 | 0.00005 |
| D4 | BDL-3 46 | 0.021 | 0.000817 | 0.393 | 0.283 | 3.41 | 0.0562 | 0.0002 | 0.00672 | 0.00002 | 0.00081 | 0.00007 | 0.70536 | 0.00006 |
| D4 | BDL-3 47 | 0.019 | 0.000196 | 0.342 | 0.245 | 2.96 | 0.0562 | 0.0002 | 0.00671 | 0.00003 | 0.00022 | 0.00001 | 0.70531 | 0.00006 |
| D4 | BDL-3 48 | 0.020 | 0.000325 | 0.363 | 0.261 | 3.15 | 0.0561 | 0.0002 | 0.00669 | 0.00002 | 0.00034 | 0.00002 | 0.70527 | 0.00006 |
| D4 | BDL-3 49 | 0.022 | 0.000042 | 0.397 | 0.285 | 3.44 | 0.0563 | 0.0002 | 0.00672 | 0.00002 | 0.00004 | 0.00001 | 0.70538 | 0.00006 |
| D4 | BDL-3 50 | 0.020 | 0.000143 | 0.377 | 0.270 | 3.27 | 0.0563 | 0.0002 | 0.00673 | 0.00002 | 0.00014 | 0.00001 | 0.70532 | 0.00006 |
| D4 | BDL-3 51 | 0.018 | 0.001162 | 0.340 | 0.244 | 2.95 | 0.0566 | 0.0002 | 0.00675 | 0.00002 | 0.00130 | 0.00007 | 0.70542 | 0.00006 |
| D4 | BDL-3 52 | 0.022 | 0.000193 | 0.413 | 0.297 | 3.58 | 0.0561 | 0.0002 | 0.00670 | 0.00002 | 0.00018 | 0.00001 | 0.70535 | 0.00006 |
| D5 | BDL-3 53 | 0.024 | 0.000025 | 0.436 | 0.313 | 3.78 | 0.0566 | 0.0002 | 0.00676 | 0.00002 | 0.00002 | 0.00001 | 0.70537 | 0.00005 |
| D5 | BDL-3 54 | 0.020 | 0.002495 | 0.361 | 0.261 | 3.14 | 0.0562 | 0.0002 | 0.00671 | 0.00002 | 0.00259 | 0.00009 | 0.70539 | 0.00005 |
| D5 | BDL-3 55 | 0.016 | 0.000386 | 0.303 | 0.217 | 2.62 | 0.0561 | 0.0002 | 0.00669 | 0.00002 | 0.00048 | 0.00002 | 0.70542 | 0.00006 |
| D5 | BDL-3 56 | 0.018 | 0.001004 | 0.333 | 0.240 | 2.89 | 0.0565 | 0.0002 | 0.00675 | 0.00002 | 0.00114 | 0.00009 | 0.70537 | 0.00006 |
| D5 | BDL-3 57 | 0.018 | 0.000336 | 0.329 | 0.236 | 2.85 | 0.0566 | 0.0002 | 0.00676 | 0.00002 | 0.00039 | 0.00001 | 0.70535 | 0.00006 |
| D5 | BDL-3 58 | 0.018 | 0.000903 | 0.326 | 0.234 | 2.83 | 0.0564 | 0.0002 | 0.00673 | 0.00002 | 0.00107 | 0.00013 | 0.70533 | 0.00005 |

|                    |          |       |          |       |       |      |        |        |         |         |         |         |                |                |
|--------------------|----------|-------|----------|-------|-------|------|--------|--------|---------|---------|---------|---------|----------------|----------------|
| D5                 | BDL-3 59 | 0.018 | 0.000154 | 0.324 | 0.233 | 2.82 | 0.0566 | 0.0002 | 0.00676 | 0.00003 | 0.00018 | 0.00001 | 0.70537        | 0.00006        |
| D5                 | BDL-3 60 | 0.023 | 0.000590 | 0.417 | 0.299 | 3.61 | 0.0563 | 0.0001 | 0.00672 | 0.00002 | 0.00054 | 0.00001 | 0.70532        | 0.00005        |
| D5                 | BDL-3 61 | 0.023 | 0.000607 | 0.422 | 0.303 | 3.65 | 0.0563 | 0.0002 | 0.00673 | 0.00002 | 0.00057 | 0.00009 | 0.70536        | 0.00006        |
| D5                 | BDL-3 62 | 0.026 | 0.000176 | 0.468 | 0.335 | 4.05 | 0.0563 | 0.0001 | 0.00672 | 0.00002 | 0.00014 | 0.00001 | 0.70532        | 0.00005        |
| D5                 | BDL-3 63 | 0.025 | 0.000565 | 0.450 | 0.323 | 3.90 | 0.0565 | 0.0001 | 0.00674 | 0.00002 | 0.00049 | 0.00003 | 0.70536        | 0.00005        |
| D5                 | BDL-3 64 | 0.027 | 0.004916 | 0.503 | 0.363 | 4.35 | 0.0562 | 0.0001 | 0.00671 | 0.00001 | 0.00368 | 0.00021 | 0.70532        | 0.00004        |
| D5                 | BDL-3 65 | 0.024 | 0.001570 | 0.443 | 0.318 | 3.83 | 0.0562 | 0.0001 | 0.00671 | 0.00002 | 0.00134 | 0.00007 | 0.70533        | 0.00005        |
| D6                 | BDL-3 66 | 0.024 | 0.004313 | 0.433 | 0.312 | 3.75 | 0.0565 | 0.0002 | 0.00674 | 0.00002 | 0.00373 | 0.00017 | 0.70540        | 0.00005        |
| D6                 | BDL-3 67 | 0.024 | 0.000575 | 0.431 | 0.309 | 3.73 | 0.0564 | 0.0001 | 0.00673 | 0.00002 | 0.00050 | 0.00001 | 0.70537        | 0.00005        |
| D6                 | BDL-3 68 | 0.026 | 0.000175 | 0.474 | 0.340 | 4.11 | 0.0566 | 0.0002 | 0.00675 | 0.00002 | 0.00014 | 0.00001 | 0.70532        | 0.00005        |
| D6                 | BDL-3 69 | 0.024 | 0.000071 | 0.436 | 0.312 | 3.77 | 0.0565 | 0.0001 | 0.00675 | 0.00002 | 0.00006 | 0.00001 | 0.70539        | 0.00005        |
| D6                 | BDL-3 70 | 0.027 | 0.000559 | 0.488 | 0.350 | 4.23 | 0.0564 | 0.0002 | 0.00673 | 0.00002 | 0.00043 | 0.00003 | 0.70536        | 0.00005        |
| D6                 | BDL-3 71 | 0.024 | 0.000803 | 0.433 | 0.311 | 3.76 | 0.0564 | 0.0001 | 0.00673 | 0.00002 | 0.00068 | 0.00004 | 0.70535        | 0.00005        |
| D6                 | BDL-3 72 | 0.029 | 0.000640 | 0.541 | 0.388 | 4.68 | 0.0564 | 0.0001 | 0.00673 | 0.00002 | 0.00045 | 0.00007 | 0.70529        | 0.00004        |
| D6                 | BDL-3 73 | 0.022 | 0.000160 | 0.395 | 0.283 | 3.42 | 0.0563 | 0.0002 | 0.00673 | 0.00002 | 0.00015 | 0.00001 | 0.70533        | 0.00006        |
| D6                 | BDL-3 74 | 0.022 | 0.000356 | 0.408 | 0.293 | 3.53 | 0.0562 | 0.0002 | 0.00671 | 0.00002 | 0.00033 | 0.00001 | 0.70536        | 0.00005        |
| D6                 | BDL-3 75 | 0.021 | 0.000459 | 0.393 | 0.282 | 3.41 | 0.0564 | 0.0002 | 0.00673 | 0.00002 | 0.00044 | 0.00001 | 0.70537        | 0.00005        |
| D6                 | BDL-3 76 | 0.028 | 0.000107 | 0.512 | 0.368 | 4.44 | 0.0564 | 0.0001 | 0.00673 | 0.00002 | 0.00008 | 0.00001 | 0.70534        | 0.00005        |
| D6                 | BDL-3 77 | 0.022 | 0.000171 | 0.400 | 0.287 | 3.47 | 0.0562 | 0.0002 | 0.00671 | 0.00003 | 0.00017 | 0.00001 | 0.70528        | 0.00006        |
| D6                 | BDL-3 78 | 0.023 | 0.001174 | 0.430 | 0.309 | 3.73 | 0.0564 | 0.0001 | 0.00674 | 0.00002 | 0.00103 | 0.00001 | 0.70536        | 0.00005        |
| <b>Average/2SD</b> |          |       |          |       |       |      |        |        |         |         |         |         | <b>0.70535</b> | <b>0.00006</b> |
